**Title:** The hyperstability and composition of *Giardia*'s ventral disc highlights the remarkable versatility of microtubule organelles

**Authors:** \*Nosala, C., \*Hagen, K.D., Chase, T.M., Jones, K., Loudermilk, R., Nguyen, K., and S.C. Dawson

\*These authors contributed equally to this work.

**Address:**

Department of Microbiology and Molecular Genetics

One Shields Avenue

University of California, Davis

Davis, CA 95616

530-752-3633

[scdawson@ucdavis.edu](mailto:scdawson@ucdavis.edu)

1 **Abstract**

2 *Giardia* is a common protistan parasite that causes diarrheal disease worldwide. Motile  
3 trophozoites colonize the small intestine, attaching to the villi with the ventral disc, a unique  
4 and complex microtubule (MT) organelle. Attachment to the host epithelium allows *Giardia* to  
5 resist peristalsis during infection of the host gastrointestinal tract. Despite our emerging view of  
6 the complexity of ventral disc architecture, we are still in the very preliminary stages of  
7 understanding how specific structural elements contribute to disc stability or generate forces  
8 for attachment. The ventral disc is a large, dome-shaped, spiral MT array decorated with  
9 microribbon-crossbridge protein complexes (MR-CB) that extend upward into the cytoplasm. To  
10 find additional disc-associated proteins (DAPs), we used a modified method for disc biochemical  
11 fractionation in high salt followed by shotgun proteomic analyses and validation by GFP-  
12 tagging. Using this method in conjunction with an ongoing subcellular localization screen, we  
13 identified 54 new DAPs. Of the 87 DAPs confirmed to date, 54 localize only to the disc, and the  
14 remainder localize to additional structures including the flagella, basal bodies, or median body.  
15 Almost one third of the known DAPs lack any homology to proteins in other eukaryotes and  
16 another one third simply contain ankyrin repeat domains. Many DAPs localize to specific  
17 structural regions of the disc, including the ventral groove region and disc margin. Lastly, we  
18 show that spiral singlet MT array comprising the disc is hyperstable and lacks dynamic  
19 instability, and we attribute these unique properties to the presence of both novel DAPs as well  
20 conserved MAPs and MIPs that are known to stabilize ciliary doublet and triplet MTs.

21

## 1 Introduction

2 Many microbial eukaryotes possess complex interphase microtubule organelles, whose  
3 structures offer a unique perspective into how the seemingly boundless capabilities of  
4 microtubule polymers are used to generate diverse forms and functions in cells. As compared  
5 to the more well-studied MT-based mitotic spindle or cilium (Chaaban and Brouhard, 2017),  
6 microtubules in these unique organelles are often arranged into elaborate and stable higher-  
7 order assemblies and are composed of proteins that lack homology to MT-binding proteins in  
8 other eukaryotes (Hagen et al., 2011; Hu et al., 2006; Preisner et al., 2016). Interphase  
9 microtubule-based organelles in protists thus represent an untapped reservoir of non-canonical  
10 MT-binding proteins governing MT assembly, nucleation, or dynamics (Dawson and Paredez,  
11 2013).

12 The widespread protistan intestinal parasite *Giardia lamblia* is defined by one such  
13 elaborate cup-shaped microtubule (MT) organelle, the ventral disc (Crossley and Holberton,  
14 1983a; Crossley and Holberton, 1985; Feely et al., 1982; Friend, 1966; Holberton, 1973;  
15 Holberton, 1981). Infectious *Giardia* cysts are commonly ingested from contaminated water  
16 sources (Einarsson et al., 2016) and excyst into flagellated trophozoites. Using the ventral disc,  
17 trophozoites attach to the intestinal microvilli and resist being dislodged by peristalsis  
18 (Elmendorf et al., 2003; Nosala and Dawson, 2015). Trophozoite colonization leads to acute or  
19 chronic diarrheal disease in humans and other animals (Nosala and Dawson, 2015). While the  
20 molecular mechanisms of attachment are not well understood, *Giardia* trophozoites are  
21 thought to attach to surfaces via hydrodynamic suction-based forces that result in a pressure

1 differential underneath the disc relative to the outside medium (Hansen et al., 2006; Holberton,  
2 1974). Overall conformational changes of regions of the disc may also either create or modulate  
3 attachment forces in the absence of canonical MT dynamic instability (Dawson et al., 2007;  
4 Woessner and Dawson, 2012).

5 The intricate architecture of the ventral disc was first described by Cheissin over 50 years  
6 ago (Cheissin, 1964). Early work described the novel structural elements associated with the  
7 ventral disc microtubules (Friend, 1966), and the first 3D high-resolution structure of the  
8 ventral disc was obtained recently using cryo-electron tomography (cryo-ET) (Schwartz et al.,  
9 2012). Cryo-ET of whole isolated ventral discs with sub-tomographic averaging defined an  
10 elaborate cytoskeletal architecture with dense protein complexes coating nearly every  
11 protofilament of the microtubule spiral array (Figure 1A and (Schwartz et al., 2012)).

12 The complex architecture, composition, and functioning of the ventral disc exemplifies the  
13 profound capabilities of microtubule polymers. Roughly one hundred, uniformly spaced MTs  
14 spiral one and a quarter turns to form an 8  $\mu\text{m}$  in diameter domed organelle required for host  
15 attachment (Brown et al., 2016). An overlap zone occurs between the upper and lower portions  
16 of the spiral (Figure 1A, B). Associated with the entire length of the MT spiral are unique  
17 repetitive substructural elements – the trilaminar microribbons – that extend 150-400 nm  
18 dorsally into the cytoplasm and are believed to stabilize the overall disc structure (Holberton,  
19 1973; Holberton, 1981) (see Figure 1C, D). Regularly spaced “crossbridge” structures link  
20 adjacent microribbons (Holberton, 1973) and repeat every 16 nm (Figure 1D), corresponding to  
21 the distance of two alpha/beta tubulin dimers. MAPs termed sidearms and paddles repeat

1 every 8 nm and are spaced at the distance of a single alpha/beta tubulin dimer (Figure 1). Other  
2 repetitive MT-associated substructures include three MT-associated proteins (gMAPs 1-3) and  
3 three MT inner proteins (gMIPs 5, 7 and 8) (Schwartz et al., 2012). An associated structure at  
4 the disc periphery, the lateral crest (Figure 1C), forms a seal with surfaces in early attachment  
5 (Feely, 1990; Feely et al., 1982; House et al., 2011).

6 Despite our emerging view of the complexity of the ventral disc architecture (Brown et al.,  
7 2016), we still know very little about the composition of the disc or the contribution of specific  
8 structural elements to disc stability and the generation of attachment forces. While abundant  
9 MT-associated proteins termed 'giardins' were isolated from the disc two decades after the  
10 initial disc structures were described (Crossley and Holberton, 1983a), the identities of proteins  
11 composing the unique MT-associated structure of the disc have remained elusive. In a  
12 comprehensive proteomic analysis of detergent-extracted, isolated ventral discs, we previously  
13 identified nearly twenty new disc-associated proteins (now referred to as DAPs, rather than  
14 giardins) that localize to regions of the ventral disc or lateral crest (Hagen et al., 2011).

15 The complexity of the disc architecture as revealed by more detailed cryo-ET implies that  
16 there are disc proteins still to be discovered (Brown et al., 2016). Here we have identified 54  
17 additional disc-associated proteins (DAPs) using a modified method of disc biochemical  
18 fractionation in high salt followed by shotgun proteomic analyses with subsequent confirmation  
19 of these or other DAPs by GFP-tagging (Harb and Roos, 2015). Fifty-four of the 87 total DAPs  
20 localize exclusively to the disc, and the remainder localize to other MT structures such as the  
21 flagella, basal bodies, or median body. Lastly, we demonstrate that the disc singlet MT spiral

1 array is a “hyperstable” structure that includes conserved MAPs and MIPs (Nosala et al., 2018)  
2 that are known to stabilize ciliary double and triple MTs (Ichikawa and Bui, 2018; Stoddard et  
3 al., 2018). Many of the newly described DAPs likely facilitate disc MT nucleation, MT plus-end  
4 binding, or stabilization of the curved spiral array of microtubules. Future genetic and  
5 functional analyses of DAPs will be central toward understanding disc architecture, assembly  
6 and dynamics.

7

## 8 **Materials and Methods**

### 9 ***Giardia* culture conditions**

10 *Giardia* strains were cultured in sterile 16 ml screw-capped disposable tubes (BD Falcon)  
11 containing 12 ml modified TYI-S-33 medium supplemented with bovine bile and 5% adult and  
12 5% fetal bovine serum (House et al., 2011). Cultures were incubated upright at 37°C without  
13 shaking and reached confluence at ~48 hours. Puromycin (50 µg/ml) was added when required  
14 to maintain episomal plasmids in GFP strains.

### 15 ***C-terminal GFP tagging of candidate disc-associated proteins***

16 *Giardia* GFP strains were created using Gateway cloning as previously described (Hagen et al.,  
17 2011). To add C-terminal GFP tags to candidate DAPs, PCR forward primers were designed to  
18 bind 200 bp upstream of the gene to include the *Giardia* native promoter. Full-length genes  
19 lacking stop codons were amplified from *Giardia lamblia* strain WBC6 genomic DNA using either  
20 PfuTurbo Hotstart PCR Master Mix or Easy-A High Fidelity PCR Master Mix (Agilent) and were

1 cloned into the ThermoFisher Scientific Gateway entry vectors pENTR/D-TOPO (blunt-end,  
2 directional TOPO cloning) or pCR8/GW/TOPO (for efficient TOPO TA cloning), respectively.  
3 Inserts were sequenced to confirm gene identity and correct orientation. To generate DAP-GFP  
4 fusions, entry vectors were recombined with the *E. coli*/*Giardia* Gateway destination vector  
5 pcGFP1F.pac (GenBank #MH048881) (Dawson and House, 2010) via LR recombination using LR  
6 Clonase II Plus (ThermoFisher Scientific). Clones were screened by Ascl digest and Qiagen's  
7 Plasmid Plus Midi Kit was used to prepare bulk plasmid DNA. To create *Giardia* strains  
8 expressing GFP-tagged candidate DAPs, 20 µg plasmid DNA was introduced into 10<sup>7</sup> *G. lamblia*  
9 strain WBC6 (ATCC 50803) trophozoites by electroporation using a Bio-Rad GenePulserXL as  
10 previously described (Dawson et al., 2007). Transfectants were initially selected with 10 µg /ml  
11 puromycin; the antibiotic concentration was increased to 50 µg /ml once cultures reached 50%  
12 confluence (typically 7 to 10 days). Cultures were maintained with selection for at least two  
13 weeks prior to the preparation of frozen stocks.

#### 14 ***Biochemical fractionation of the Giardia cytoskeleton***

15 Detergent extraction of *Giardia*'s microtubule cytoskeleton was performed as previously  
16 described (Hagen et al., 2011) with modifications indicated below. Medium was decanted from  
17 each confluent culture tube and trophozoites were washed *in situ* three times with 5 ml of  
18 warmed 1X HEPES Buffered Saline (HBS). To demembranate cytoskeletons, cells were iced for  
19 15 minutes in the last 1X HBS wash, pelleted by centrifugation (1000 × g, 5 minutes), and  
20 resuspended in 1 ml of 1X PHEM (60 mM PIPES, 25 mM HEPES, 10 mM EGTA, 1 mM MgCl<sub>2</sub>, pH  
21 7.4) containing 1% Triton X-100 and 1M KCl. 1X HALT protease inhibitor cocktail (Roche) was

1 added to prevent proteolysis. This solution was transferred to an Eppendorf tube and vortexed  
2 continuously for 30 minutes at medium speed. Ventral disc cytoskeletons were then pelleted as  
3 above and washed twice in 1X PHEM lacking both Triton X-100 and KCl. Sufficient extraction of  
4 cytoskeletons was confirmed by wet mount using DIC microscopy.

5 Cytoskeletons were fractionated as previously described (Crossley and Holberton, 1983a;  
6 Crossley and Holberton, 1983b; Crossley and Holberton, 1985) and Figure 2A). Following  
7 detergent extraction, an aliquot of demembrated cytoskeletons in PHEM was retained as  
8 'P1.' Cytoskeletons were then pelleted as described above, washed, and resuspended in CB  
9 buffer (10mM Tris, 1mM EDTA, pH 7.7) for 48 hours to further disrupt the cytoskeleton.  
10 Leftover cytoskeletal complexes were pelleted at 1000 x g for 5 minutes and the supernatant  
11 was retained as 'S2.' Complexes were next washed and resuspended in MR buffer (10mM  
12 HEPES, 5mM EDTA, pH 8.7) for 48 hours. Any remaining complexes were then pelleted, and the  
13 supernatant was retained as 'S3.' Complexes in the final pellet were resuspended in 1X PHEM  
14 and retained as 'P3.'

#### 15 ***SDS-PAGE and Western Blotting***

16 For Western blots, total cell lysate in RIPA buffer (20 µg) was run on Precise Tris-HEPES SDS  
17 PAGE gels, 4–20% (ThermoFisher). Proteins were transferred onto 0.45 micron nitrocellulose  
18 membrane (Bio-Rad) and blocked for 1 hour at room temperature in 5% (wt/vol) milk in PBS  
19 with 0.05% Tween. Antibodies were diluted in 5% (wt/vol) milk in PBS with 0.05% Tween as  
20 follows: anti-HA (Sigma) 1:5000, goat anti-mouse IgG HRP (Bio-Rad) 1:10000. Amersham ECL  
21 Prime substrate (GE Healthcare) was used for chemiluminescent detection. For SDS-PAGE of



1 fractionated proteins, 20 ul of total undiluted fraction samples were run as for Western blots.  
2 Gels were stained in True Blue for 1 hour, then rinsed with MilliQ water and incubated with  
3 MilliQ water overnight at room temperature to destain.

#### 4 ***Proteomic analyses of fractions and mass spectrometry***

5 All MS/MS samples were analyzed using X! Tandem (The GPM, [thegpm.org](http://thegpm.org); version X! Tandem  
6 Alanine (2017.2.1.4)). X! Tandem was used to search the uniprotgiardiaintestinalis\_Craprev  
7 database (14528 entries) assuming the digestion enzyme trypsin and with a fragment ion mass  
8 tolerance of 20 PPM and a parent ion tolerance of 20 PPM. X! Tandem variable modifications  
9 specified were Glu->pyro-Glu of the N-terminus, ammonia-loss of the N-terminus, gln->pyro-  
10 Glu of the N-terminus, deamidated of asparagine and glutamine, oxidation of methionine and  
11 tryptophan and dioxidation of methionine and tryptophan. Scaffold (version Scaffold\_4.8.4,  
12 Proteome Software Inc., Portland, OR) was used to validate MS/MS based peptide and protein  
13 identifications. Peptide identifications were accepted if they exceeded specific database search  
14 engine thresholds. Protein identifications were accepted if they contained at least 5 identified  
15 peptides. Proteins that contained similar peptides and could not be differentiated based on  
16 MS/MS analysis alone were grouped to satisfy the principles of parsimony. Proteins sharing  
17 significant peptide evidence were grouped into clusters.

#### 18 ***Live imaging of GFP-tagged DAP strains***

19 Strains were thawed from frozen stocks and cultured for 24 to 48 hours prior to live imaging.  
20 Trophozoites were iced 15 minutes, harvested by centrifugation at 1000 x g, resuspended in  
21 warm medium, and incubated in 96-well black glass bottom imaging plates (Cellvis, Mountain

1 View, CA) for up to 2 hours at 37°C in a nitrogen-enriched atmosphere to promote attachment.  
2 The medium was replaced with 1X HBS, and the trophozoites were incubated under the same  
3 conditions for 30 minutes. Additional warm HBS washes were performed as needed during  
4 imaging to remove detached cells. Imaging was performed using differential interference  
5 contrast (DIC) and epifluorescence with a Leica DMI6000B wide-field inverted fluorescence  
6 microscope (Plan Apo 100X, NA 1.40 oil immersion objective). Optical sections were acquired at  
7 0.2- $\mu$ m intervals with a QImaging Rolera-MGi Plus EMCCD camera and MetaMorph acquisition  
8 software (MDS Analytical Technologies). Images were processed using Fiji, and two-dimensional  
9 maximum intensity projections were created from the three-dimensional data sets when  
10 required.

### 11 ***Structured Illumination Microscopy***

12 3D stacks were collected at 0.125  $\mu$ m intervals on the Nikon N-SIM Structured Illumination  
13 Super-resolution Microscope with a 100x/NA 1.49 objective, 100 EX V-R diffraction grating, and  
14 an Andor iXon3 DU-897E EMCCD. Images were recollected and reconstructed in the “2D-SIM”  
15 mode (no out of focus light removal; reconstruction used three diffraction grating angles each  
16 with three translations).

### 17 ***Transmission Electron Microscopy***

18 Cytoskeleton preps were prepared as above and applied to 400 mesh formvar/carbon coated  
19 glow-discharged grids. Negative staining was performed by applying 1% phosphotungstic acid,  
20 pH 5.4, and grids were dried by blotting without washes. For thin sections, *Giardia* trophozoites  
21 that were pelleted or attached to ACLAR discs (Electron Microscopy Sciences) were fixed for 10

1 minutes in 4% paraformaldehyde and secondarily fixed for 1 hour in 1% osmium tetroxide. Cells  
2 were washed three times with cold ddH<sub>2</sub>O to remove fixative, dehydrated through ascending  
3 concentrations of ethanol (30%, 50%), and incubated for 1 hour in 2% uranyl acetate in 50%  
4 ethanol. Dehydration continued through 70% and 3 x 95% ethanol and was completed with  
5 three changes in 100% ethanol for a minimum of 10 minutes each change. Cell were embedded  
6 in 1:1 epoxy resin:acetone overnight at room temperature. The next day the resin was  
7 removed and replaced with 100% resin twice for two hours each. The ACLAR discs were placed  
8 at the bottom of a flat bottom beam capsule with the cells facing up and the capsule was filled  
9 with fresh resin. The blocks were polymerized at 70C overnight. The blocks were trimmed, and  
10 thin sections were cut with a Leica UCT ultramicrotome (Leica Ultracut UCT, Leica, Vienna,  
11 Austria) and stained with 2% uranyl acetate in 70% ethanol and lead citrate before viewing in  
12 the Talos L120C electron microscope (FEI Company /ThermoScientific, Hillsboro, OR., U.S.A.  
13 made in Eindhoven, The Netherlands) at 100KV. Images were acquired using the fully  
14 integrated Ceta CMOS camera.

15

## 16 **Results**

### 17 ***Biochemical fractionation of isolated cytoskeletons into disc and flagella-enriched fractions*** 18 ***for shotgun proteomic analysis.***

19 Using cryo-ET of detergent extracted cytoskeletons (disc and flagella), Brown et al. recently  
20 defined specific regional variations in the ventral disc architecture, such as the ventral groove,  
21 disc margin and overlap zone areas (Brown et al., 2016). We hypothesized that the protein

1 density disparities observed in these regions may represent targeting of specific DAPs to these  
2 disc regions. To find additional proteins that comprise these structurally distinct regions of the  
3 disc, we developed a novel biochemical fractionation protocol to disrupt the cytoskeleton and  
4 obtain a disc-enriched fraction, and used proteomic analysis and GFP tagging to identify  
5 candidate proteins.

6 Detergent extraction of *Giardia* trophozoites with Triton X-100 removes membrane and  
7 cytosol from the entire microtubule cytoskeleton and yields intact ventral discs and associated  
8 axonemes that are stable in PHEM buffer for weeks (Crossley and Holberton, 1983a; Crossley  
9 and Holberton, 1983b; Crossley and Holberton, 1985; Holberton and Ward, 1981). In a prior  
10 proteomic analysis of detergent-extracted, isolated cytoskeletons, we identified nearly twenty  
11 new DAPs that specifically localize to regions of the ventral disc or lateral crest (Hagen et al.,  
12 2011). Here we extracted trophozoites with both 1% Triton X-100 and 1M KCl (Figure 2A, P1  
13 fraction), which facilitated the removal of contaminating proteins from the nuclei and cytosol as  
14 observed by negative staining EM. The disc and flagellar cytoskeletons were retained following  
15 the high salt extraction (Figure 2B, C). Negative staining of the P1 fraction (Figure 2D) showed  
16 the loss of the nuclei, and retention of the disc, flagella, and the funis. Subsequent extractions  
17 with Tris-EDTA and HEPES buffers were used to destabilize the cytoskeleton and release the  
18 disc from the axonemes and basal bodies, resulting in pellet or supernatant fractions (S2, S3,  
19 and P3). Using a strain with fluorescently tagged delta-giardin (Figure 2C, D), we determined  
20 that these additional treatments produced a fraction enriched for ventral discs (S3 fraction).  
21 These treatments also result in a relaxation of the normally domed and closed ventral disc  
22 spiral (Figure 2E, F). Many structural components of flagella are also removed in fraction S3

1 (Figure 2E, F). SDS-PAGE of each fraction resolved proteins enriched in each pellet (P1, P3) and  
2 supernatant (S2, S3) fraction (Figure 2G).

### 3 ***Proteomics and mass spectrometry of fractions enriched in ventral disc or flagellar proteins***

4 The composition of each fraction (P1, S2, S3, and P3) was determined by mass spectrometry.  
5 Proteins with fewer than five hits were excluded, and the four fractions were compared (Figure  
6 2H and Supplemental Table 1). One hundred and fifty-seven proteins were identified with at  
7 least five hits in any fraction (Table 1). Tubulins, giardins, median body protein and GASP-180  
8 family proteins were among the most commonly identified proteins. Thirty-five proteins  
9 occurred in every fraction examined, including 15 new and five previously described DAPs (e.g.,  
10 beta giardin (Baker et al., 1988), delta giardin (Jenkins et al., 2009), SALP-1 (Palm et al., 2005)).  
11 Ten proteins were unique to the P1 fraction. Twenty-four proteins were enriched in the S2  
12 fraction, and nine were enriched in the P3 fraction as compared to other fractions.

13 Tagging of selected proteins from these fractions allowed us to verify the selective enrichment  
14 of disc from flagellar components of the cytoskeletal preparations. Forty-nine DAPs were  
15 present in the P1, S2, or S3 fractions. While no proteins were specifically enriched in the S3  
16 fraction (Figure 2H and Supplemental Table 1), 25 proteins in the S3 fraction had disc  
17 localization and only four localized to the flagella. In contrast, no DAPs were observed in  
18 fraction P3; the GFP-tagged proteins in this fraction localized only to the median body or the  
19 axonemes. Only one flagellar-localizing protein (DAP16996) was present in all four fractions.  
20 Twenty-two structural flagellar proteins (e.g., basal bodies or axonemes) were present in the  
21 P1, S2, or S3 fractions, and 16 were present in just the P1 or S2 fractions. Four lateral crest-

1 localizing proteins were only present in the P1 fraction, and one lateral crest protein was  
2 present in both the P1 and S2 fractions. Thirty-nine DAPs that were previously identified or  
3 localized in an ongoing GFP tagging project (Nosala et al., 2018) were below the limit of  
4 detection in the proteomic analyses of the fractions. These 39 DAPs were included in  
5 subsequent analyses of ventral disc composition (Figure 3 and Figure 4, Supplemental Table 2).

### 6 ***A revised inventory of disc-associated proteins***

7 To determine the cellular localization of candidate DAPs identified here, we created C-terminal  
8 GFP tagged fusions of candidate DAPs and expressed them using their native promoters (Figure  
9 3, Figure 4 and Supplemental Figures 1-4). The disc-specific localization of 54 new DAPs was  
10 confirmed, bringing the total number of verified DAPs to 87 (Figure 3 and Supplemental Table  
11 2). Many of the newly identified DAPs localize to the disc and one other MT structure (Figure  
12 3), such as the eight axonemes and basal bodies (27 total DAPs), the median body (23 total  
13 DAPs), or the lateral crest structure surrounding the disc (six total DAPs). Eleven DAPs localize  
14 to all of the primary MT-based structures including the disc, flagella, and median body. Forty-  
15 two of the 87 known DAPs localize only to specific regions of the ventral disc, and not to other  
16 cytoskeletal structures (Figure 3).

### 17 ***DAP compositional variation in distinct regions of the ventral disc***

18 The subcellular localizations of the 87 new and previously described disc- and median-body  
19 specific DAP-GFP strains were categorized into five distinct regions of the disc: the disc body  
20 (body), the disc margin (DM), the overlap zone (OZ), the ventral groove (VG), and the dense  
21 bands (DB) (Figure 4 and Supplemental Table 2). Overall, the majority of the 87 DAPs localize to

1 more than one disc region, with 44 DAPs localizing to the disc body; 37 DAPs to the disc margin;  
2 34 DAPs to the overlap zone; 33 DAPs to the ventral groove; and seven DAPs to the dense  
3 bands (Figure 4 and Supplemental Table 2). Thirty-six of the 87 DAPs localize to only one of the  
4 disc regions: six DAPS localize to the disc body only; three DAPs localize to the overlap zone  
5 only; 22 to the disc margin; four to the dense bands, and two DAPs only to the ventral groove.  
6 Two other DAPs localize only to the lateral crest and not to other disc or cytoskeletal elements  
7 (Figure 3, Figure 4 and Supplemental Table 2). There are also subtler yet noticeable variations in  
8 localizations within any particular disc region in the DAP-GFP strains; for example, some strains  
9 with disc body or disc margin localizations lack localization to the ventral groove region  
10 (Supplemental Figures 1-4).

### 11 ***The majority of DAPs lack known MT-binding motifs***

12 Of the total confirmed DAPs, only two possess known outer MT-binding motifs (Figure 5 and  
13 Supplemental Table 2). One is kinesin-6a (DAP102455), which localizes to the disc margin region  
14 and is the only kinesin associated with the disc. The other, DAP5374, has a CAP-GLY domain  
15 (Weisbrich et al., 2007) and localizes to four disc regions (Figure 5 and Supplemental Table 2). In  
16 contrast, 26 of the 87 DAPs lack homology to any known protein in other eukaryotes and  
17 localize to any of the five disc or lateral crest regions. An additional 29 DAPs localizing to any  
18 disc region simply contain ankyrin repeat domains (Figure 5 and Supplemental Table 2). Several  
19 DAPs are members of conserved protein families, including: three striated fiber (SF)–assemblins  
20 (beta-giardin, delta-giardin, and SALP-1 (Palm et al., 2003)); four annexins (e.g., alpha-giardins  
21 (Bauer et al., 1999; Peattie, 1990; Weiland et al., 2005; Weiland et al., 2003)), and 13 NEK  
22 kinases (Figure 5 and Table 1). Nine of the 13 NEKs lack conserved catalytic residues (Nosala et

1 al., 2018). Other DAPs include those possessing a WD40 repeat domain (DAP15218), a DUF1126  
2 domain (DAP41512), an Mlf1p domain (DAP16424), an ENTH domain (DAP3256) (Ebnetter and  
3 Hehl, 2014), or SHIPPO repeat domains (DAP103164 and DAP9148).

#### 4 ***Ventral disc integrity is insensitive to microtubule drugs and high salt extraction***

5 To evaluate the effect of MT stabilizing or depolymerizing drugs such as Taxol or nocodazole on  
6 disc structure, we treated cells with each of these drugs separately and quantified the area and  
7 overall structure of the disc body, overlap zone and central bare area. Treatment with either  
8 MT stabilizing or depolymerizing drugs had no effect on disc area or conformation (Figure 6A).  
9 In contrast, other cytoskeletal elements such as the flagella or median body are dynamic and  
10 sensitive to these MT drugs (Figure 6B).

11 The detergent extraction of ventral disc cytoskeletons with up to 2M KCl had little effect on  
12 the recovery of disc-associated proteins as seen by SDS-PAGE (Figure 6C). Furthermore, the  
13 GFP-tagged disc protein DAP16343 (or MBP) remains associated with the disc even after  
14 extraction with 1M KCl. Alpha tubulin and delta-giardin, a component of the microribbons, also  
15 remain associated with the disc following high salt extraction (Figure 6D).

16

#### 17 **Discussion**

18 Cytoskeletal innovation and diversity are widespread in eukaryotic cells (Dawson and Paredez,  
19 2013), and *Giardia* and other diverse emerging cell biological model systems offer a wealth of  
20 unexplored microtubule structures with unique functional properties (Russell et al., 2017). Here



1 we identified and confirmed 54 new proteins in *Giardia's* unique ventral disc, adding to the 33  
2 previously described DAPs (Hagen et al., 2011) . Eighty-five of the 87 DAPs lack homology to  
3 known MAPs that bind to the outside of MTs (Figure 5), and close to a third of DAPs lack any  
4 homology to proteins outside of *Giardia* species (Andersson et al., 2007). Through their binding  
5 to both the outside and inside of almost all disc MT protofilaments, many DAPs (including  
6 gMAPs and gMIPs) and protein complexes (e.g., MR-CB complexes) likely confer hyperstability  
7 to the disc singlet MT array (Brown et al., 2016; Schwartz et al., 2012). Other DAPs likely  
8 contribute to nucleating the spiral disc MTs, facilitating curvature and doming of the disc, or  
9 stabilizing MT plus and minus ends (Brown et al., 2016; Schwartz et al., 2012).

10

### 11 ***Conserved MAPs and MIPs likely confer stability and flexibility to the disc singlet MTs***

12 The singlet MTs of the curved disc spiral array create the domed shape of the disc that is crucial  
13 for *Giardia* attachment (Woessner and Dawson, 2012), and must withstand intense mechanical  
14 forces, much like the forces acting on ciliary doublet MTs during beating (Linck et al., 2014).  
15 Singlet MTs typically exhibit dynamic instability, although they can be stabilized or modulated  
16 by the activities of various plus-end binding proteins (e.g., EB1, XMAP215) (Akhmanova and  
17 Steinmetz, 2015; Bowne-Anderson et al., 2015). In contrast, the hyperstability of cilia,  
18 centrioles, and basal bodies is proposed to result from both the overall structure of the doublet  
19 and triplet MTs that comprise these organelles and from MAPs and MIPs associated along their  
20 entire lengths. Like hyperstable cilia, the ventral disc singlet MTs are coated with gMAPs, gMIPs

1 and other associated protein complexes, forming a hyperstable spiral lattice that is resistant to  
2 detergent and high salt extraction (Figure 6).

3 More well-studied MAPs, like tektins or tau, stabilize MTs by binding to the outside surface  
4 of the microtubule (Amos, 2004; Amos, 2008). *Giardia* lacks both tektin and tau homologs  
5 (Morrison et al., 2007), and we identified only a handful of DAPs with known MT binding  
6 domains (Figure 5). However, several of the newly identified DAPs are homologous to proteins  
7 that may confer stability to axonemes in other ciliated cells (Supplemental Figure 2). Two DAPs  
8 (DAP9148 and DAP103164) are homologous to less well-studied SHIPPO repeat domain  
9 proteins predicted to stabilize and add rigidity to MTs of the sperm tail (Egydio de Carvalho et  
10 al., 2002). These two SHIPPO repeat DAPs localize not only to the disc, but also to the eight  
11 axonemes and the median body (Figure 3 and Supplemental Table 2), which implies a broader  
12 role for SHIPPO repeat proteins in MT stability. DAP16263 localizes to the disc overlap zone and  
13 cytoplasmic axonemes and belongs to conserved protein family (DIP13) that localizes to the  
14 centrioles and ciliary MTs in *Chlamydomonas*, possibly stabilizing MTs (Pfannenschmid et al.,  
15 2003). The human neuronal DIP13 homolog SSNA1 has recently been shown to be involved in  
16 MT nucleation and MT branching (Basnet et al., 2018). Thus, DAP16263 may contribute to  
17 stabilization, branching or assembly of disc MTs in the overlap zone region.

18 Single-particle cryo-ET of isolated doublet MTs identified microtubule inner proteins (or  
19 MIPs) that form a lateral and longitudinal meshwork in metazoan, algal, or *Tetrahymena* ciliary  
20 MTs (Ichikawa and Bui, 2018). Microtubule-stabilizing drugs like Taxol also bind to the inside of  
21 the microtubule wall (Nogales et al., 1999). This inner scaffold formed by MIPs is thought to

1 strengthen tubulin dimer and protofilament coherence, promoting microtubule stability and/or  
2 elasticity during ciliary beating (Ichikawa and Bui, 2018). MIPs are also implicated in the  
3 stabilization and the elasticity of the singlet subpellicular microtubules of the malarial parasite  
4 *Plasmodium*, enabling the highly elastic, yet stable cytoskeleton of sporozoites to flex as  
5 parasites squeeze through host tissues (Cyrklaff et al., 2007).

6 As seen by cryoET, three microtubule inner protein densities (gMIPs 5, 7 and 8) are  
7 present in the lumen of the *Giardia* ventral disc singlet MTs, and are suggested to support the  
8 structural integrity and hyperstability of the disc (Schwartz et al., 2012). Although the molecular  
9 identities of periodically repeating gMIPs remain unknown, we confirmed that DAP41512 – a  
10 Rib72 homolog with a DUF1126 domain – localizes to the disc margin, as well as to the flagella  
11 and median body. Rib72 homologs are thought to be globular MIPs, and *Tetrahymena* RIB72A  
12 and RIB72B are essential for the assembly of A-tubule MIPs in cilia (Stoddard et al., 2018).  
13 FAP52 is another widely conserved MIP recently shown to localize to the inner junction of  
14 doublet MTs (Owa, 2018). *Giardia* has two FAP52 homologs (DAP15218 and DAP15996) that  
15 contain WD40 motifs and localize to all flagella. The localizations of *Giardia* Rib72 and FAP52  
16 MIP homologs to the stable singlet MTs of the disc and the more dynamic median body MTs  
17 support a more general role for MIPs in promoting the stability and elasticity of interphase MT  
18 polymers that goes beyond stabilizing doublet and triplet MTs in axonemes.

19 ***Novel and MR-CB complex DAPs may also create or stabilize the spiral, domed MT array***

20 Some DAPs or disc protein complexes that likely regulate disc stability and architecture may be  
21 evolutionary innovations in *Giardia*. The MR-CB complexes in particular have been implicated in

1 the stabilization of the domed disc conformation essential for proper parasite attachment  
2 (Nosala et al., 2018). Three microribbon DAPs are SF-assemblins, which associate with flagellar  
3 root structures in other protists (Weber et al., 1993), including the *Toxoplasma* apical complex  
4 (Francia et al., 2012). The identities of crossbridge or other MR DAPs remain unknown.  
5 Detergent-extracted discs are flattened, yet disc microtubules remained curved despite the loss  
6 of overall disc cohesion and crossbridge connections (Crossley and Holberton, 1983b)  
7 (Holberton and Ward, 1981). In our modified high salt and detergent extraction, we also  
8 observed the dissociation of crossbridge connections between the microribbons; furthermore,  
9 we confirmed that these hyperstable discs were flattened, and MTs retained their overall  
10 curvature (S3 fraction, Figure 2E, F). Thus, while intact MR-CB complexes are required for the  
11 overall domed architecture of the disc, the stable curvature of MTs in the spiral is likely  
12 governed by other DAPs (Holberton, 1981; Holberton and Ward, 1981).

13 Other abundant *Giardia* DAPs have less obvious roles in disc structure and stability.  
14 Thirty DAPs have ankyrin repeat domains, and five DAPs have both NEK domains and ankyrin  
15 repeat domains (Figure 4, Figure 5 and Supplemental Table 2). Ankyrin repeat proteins  
16 generally mediate protein-protein interactions and protein stability (Li et al., 2006). They are  
17 key components of the conoid MT organelle in the apicomplexan protist *Toxoplasma gondii*  
18 (Long et al., 2017). In human erythrocytes, muscles, and neurons, ankyrin proteins stabilize  
19 subsets of microtubules and can directly interact with tubulin *in vitro* (Bennett and Davis, 1981;  
20 Davis and Bennett, 1984).

21 ***DAPs delineate discrete functional regions of the disc architecture***

1 The disc MTs vary in length from 2 to 18  $\mu\text{m}$ , and overall form more than 1.2 mm of  
2 polymerized tubulin (Brown et al., 2016). Almost all protofilaments of each disc MT are coated  
3 with different DAPs or complexes as they extend from the dense band nucleation zone and  
4 terminate at the disc margin (Brown et al., 2016). The strikingly distinct localization patterns of  
5 the 87 DAPs (Figure 4) mirror the structural regions in the disc defined by cryo-ET, including the  
6 disc margin, dense bands, ventral groove region and overlap zone (Brown et al., 2016).

7       Drugs that affect MT dynamic instability have little or no effect on disc MT dynamics or  
8 the overall disc structure ((Dawson et al., 2007) and Figure 6)) which implies that some DAPs  
9 may modulate dynamic instability at the plus or minus ends. In general, microtubule plus-end-  
10 tracking proteins (+TIPs) accumulate at growing plus ends, where they modulate and couple  
11 dynamic MT movements to cellular structures (Akhmanova and Hoogenraad, 2005). The plus  
12 ends of the ventral disc MTs are primarily located at the outer edge of the disc in the disc  
13 margin and at the edges of the overlap zone region (Brown et al., 2016). While more conserved  
14 plus end binding proteins like EB1 do not localize to the disc margin (Dawson et al., 2007), a  
15 large fraction of known disc proteins—thirty-eight DAPs—localize to the disc margin and other  
16 structures, with eight DAPs localizing exclusively to this region. The majority of disc margin  
17 DAPs have ankyrin repeat domains (12 DAPs), or NEK domains (six DAPs), and ten disc margin  
18 DAPs lack homology to any known protein. Thirteen disc margin proteins also localize to other  
19 MT-based structures including the flagellar axonemes, basal bodies (Lauwaet et al., 2011), or  
20 the median body (Supplemental Table 2), which implies that some disc margin DAPs have more  
21 general MT structural or regulatory properties.

1           Overlap zone DAPs may connect and stabilize the upper and lower portions of the MT  
2 spiral, maintaining the curved disc conformation required for attachment (Nosala and Dawson,  
3 2017). Thirty-four DAPs localize to the overlap zone region, and a majority of these also localize  
4 to the disc body and/or disc margin regions. Sixteen overlap zone DAPs localize to the disc  
5 body, including the four known MR proteins. Two overlap zone DAPs also localize to the flagella  
6 and only one protein, DAP16843, localizes exclusively to the overlap zone region (Figure 4 and  
7 Supplemental Table 2). Morpholino or CRISPRi-based knockdowns of the overlap zone  
8 DAP16343 (or median body protein) have discs with flattened, open conformations (McInally  
9 SG et al., 2018; Woessner and Dawson, 2012), which suggests a role of the overlap zone region  
10 in establishing or maintaining the connections between the upper and lower regions of the disc  
11 (Figure 1).

12           The elasticity or flexibility of the disc MTs in regions such as the ventral groove or disc  
13 margin may result from differential binding of particular DAPs. In the ventral groove region,  
14 MTs lose much of their curvature and may be flexible (Brown et al., 2016). Two NEK kinases  
15 localize exclusively to this region. Four other ventral groove region proteins also localize to the  
16 disc margin, and the remainder localize to one or more other disc regions. Movements of the  
17 ventral groove and disc margin openings may mediate formation of the lateral crest seal, which  
18 would limit fluid flow underneath the disc in early stages of attachment (Nosala and Dawson,  
19 2017). It remains unclear, however, how the disc margin and ventral groove DAPs mediate  
20 these movements and whether these movements modulate fluid flow (Nosala and Dawson,  
21 2017).

1           Lastly, disc MT minus ends do not directly contact basal bodies but rather arise from a  
2 series of perpendicular bands termed the dense band (DB) nucleation zone (Brown et al., 2016).  
3 Three distinct dense bands in two regions consist of tightly packed microtubules that spiral into  
4 a nearly flat single plane. Although we have identified six DAPs localizing to these structures,  
5 the protein composition of the dense bands and the mechanism by which they support MT  
6 nucleation is undefined. About 39% of disc MTs nucleate from the disc margin (DM) region,  
7 possibly via a branching nucleation-type mechanism (Brown et al., 2016). One novel dense  
8 band protein (DAP15499) also localizes to the disc margin.

9

10 ***Disc associated proteins may regulate dorsal daughter disc assembly and parental***  
11 ***disassembly during division and encystation***

12 During *Giardia's* rapid mitosis and cytokinesis (Hardin et al., 2017), two daughter discs are  
13 assembled *de novo* on the anterior dorsal side of the parent cell, with the ventral sides of the  
14 new discs exposed on the cell surface (Tumova et al., 2007). During dorsal daughter disc  
15 assembly, the MT spiral is nucleated first, with the subsequent assembly and lengthening of the  
16 microribbons and crossbridges. The parental disc simultaneously undergoes disassembly and  
17 detachment.

18           Several putative regulatory proteins localize to the disc during division, including the  
19 sole *Giardia* aurora kinase (Davids et al., 2008), a protein phosphatase 2A (Lauwaet et al.,  
20 2007), and an ERK1 kinase that also localizes to the disc during encystation (Ellis et al., 2003).  
21 Two DAPs (DAP16424 and DAP5568) localize to both the disc margin and the basal bodies and

1 may be associated with the *Giardia* polo-like kinase due to the presence of their respective  
2 Mlf1IP and DUF866 domains. Polo-like kinase is recruited to centromeres by phosphorylating a  
3 centromere scaffolding protein, PBIP1 (also called MLF1IP). Members of the NIMA-related  
4 kinase (or NEK) family regulate centrosome separation, spindle assembly and cytokinesis during  
5 cell division through targeted phosphorylation of proteins associated with the microtubule  
6 cytoskeleton (Fry et al., 2017). *Giardia* has an expanded repertoire of over 70 NEKs (Manning et  
7 al., 2011), and 12 NEKs localize to various regions of the disc (Supplemental Table 2). Two of the  
8 NEK kinases are putatively cell cycle-specific (Davids et al., 2011). Some of the disc-associated  
9 NEK kinases lack conserved catalytic residues, yet these putative NEK pseudokinases may still  
10 retain kinase activity (Reiterer et al., 2014). In addition to putative regulatory roles, the disc-  
11 associated NEKs may contribute to disc architecture and stability or even attachment dynamics.

### 12 ***The molecular basis of functional diversity of Giardia's singlet and doublet MT arrays***

13 Different cellular contexts may dictate differential regulation of microtubule dynamics and  
14 stability. Like other protists, *Giardia* must modulate the dynamics and stability of various MT  
15 arrays in different regions of the cell during growth and cell division—the hyperstable ventral  
16 disc, the eight flagella, the median body, the funis, the caudal complex, and the two mitotic  
17 spindles all have differential stabilities and dynamics (Dawson, 2010). While *Giardia's* eight  
18 axonemes have canonical doublet and triplet MTs, the disc, funis and caudal complex are stable  
19 interphase singlet MT arrays. In contrast, the median body and the tips of the flagella are  
20 dynamic and sensitive to MT drugs ((Dawson et al., 2007) and Figure 6).



1           How does *Giardia* simultaneously and differentially regulate these functionally diverse  
2 MT arrays? Conserved MAPs and MIPs may generally regulate MT stability or dynamics (Figure  
3 3), whereas DAPs localizing to distinct regions of the disc likely confer more specific properties  
4 to the MTs in that region. One obvious way to distinguish ventral disc MTs and those of other  
5 arrays is by tubulin post-translational modifications (PTMs) (Garnham and Roll-Mecak, 2012).  
6 Tubulin PTMs may generate a functional diversity of MTs within *Giardia* by directing and/or  
7 recruiting specific DAPs or protein complexes to the specific MTs of the disc or axonemes.  
8 *Giardia* has a several tubulin tyrosine ligase-like (TLL) homologs that may post-translationally  
9 modify tubulin (Morrison et al., 2007), and various types of tubulin PTMs (i.e., acetylation and  
10 glycylation) have been reported (Weber et al., 1997) (Campanati et al., 1999; Soltys and Gupta,  
11 1994). Tubulin PTMs may also directly influence the stability of MT arrays or indirectly influence  
12 stability by regulating DAPs or other proteins that affect MT dynamics (Garnham and Roll-  
13 Mecak, 2012). We anticipate that the use of newly developed genetic tools such as CRISPR  
14 interference (CRISPRi) to repress both single or multiple endogenous genes in *Giardia* (McInally  
15 SG et al., 2018) will rapidly change how we investigate the roles of DAPs and PTMs in disc  
16 architecture, hyperstability, and attachment in this widespread parasite and emerging model  
17 system for cytoskeletal biology.

18

## 19 **Acknowledgements**

20 This work was supported by NIH R01AI077571 to SCD and Center for Comparative Medicine at  
21 UC Davis School of Medicine T32 AI060555 Animal Models of Infectious Diseases Training

- 1 Program to CN. We graciously thank Dr. Michael Paddy of the UC Davis MCB Microscopy Core
- 2 for helpful advice and use of the SDC and SIM microscopes. We also thank Patricia Kysar of the
- 3 UC Davis MCB Electron Microscopy Lab for advice and training on TEM and Michelle Salemi and
- 4 Dr. Brett Phinney at the UCD Proteomics Core for help with mass spectroscopy.

1 **Figure legends**

2 **Figure 1. Elaborate and unique protein complexes are associated with the disc spiral singlet**

3 **microtubule array.** A schematic of the ventral disc indicating the primary structural elements is

4 shown in panel A: disc body, oz: overlap zone, lc: lateral crest, vg: ventral groove region, db:

5 dense bands, dm: disc margin (A), MT: microtubule, MR: microribbon, CB: crossbridge (B,C).

6 The inset shows a cross section of the MR/CB complex and the *Giardia* MAPs (gMAPs, green) or

7 MIPs (gMIPs, orange). In B, a negative-stained cytoskeletal preparation of the ventral disc

8 highlights the primary structural elements as well as the eight cytoplasmic axonemes (CF =

9 caudal flagella; VF = ventral flagella; PF = posteriolateral flagella; AF = anterior flagella) and

10 basal bodies (BB). Scale = 1  $\mu$ m. In C, transmission electron microscopy of thin sections of whole

11 embedded trophozoites show both microribbons (MR) associated with each MT of the spiral

12 array and the associated lateral crest (LC). Scale = 200 nm. Negative staining of the disc (D)

13 highlights the microribbons (MR) linked with regularly spaced crossbridges (CB). Scale = 200 nm

14 In E, the overlap zone (OZ) of the MT spiral array, along with the MR-CB complexes are shown

15 in cross section (N = nucleus). Scale bars = 500 nm.

16 **Figure 2: Biochemical fractionation readily extracts disc and axoneme proteins for shotgun**

17 **proteomic analysis and mass spectrometry.** Extraction of *Giardia* trophozoites with detergent

18 and high salt (A) removed membrane and cytosol from the microtubule cytoskeleton (P1).

19 Subsequent extractions with Tris-EDTA and HEPES further disrupted the disc resulting in the S2,

20 P2, S3 and P3 fractions. Immunostaining of P1 fraction (B, C) shows that the disc (green, anti-

21 delta-giardin) and flagella (purple, anti-alpha-tubulin) were retained. Scale = 1  $\mu$ m (B). Scale = 5

1  $\mu\text{m}$  (C). Negative staining of the P1 fraction (D) confirms the loss of the nuclei (N) and retention  
2 of the disc (body, vg, oz, lc), flagella (AF, PF) and the funis (fn). Scale = 5  $\mu\text{m}$ . Greater  
3 dissociation of the disc from the axonemes is evident in the S3 fraction as shown by delta-  
4 giardin immunostaining (E, F). SDS-PAGE resolves proteins that are enriched in each pellet (P1,  
5 P3) and supernatant (S2, S3) fraction. Following mass spectrometry of each fraction (P1, P3 and  
6 S2, S3), the Venn Diagram comparison indicates some overlap between proteins in the various  
7 fractions (H). Scale bars = 5  $\mu\text{m}$ .

8

9 **Figure 3. Many disc-associated proteins (DAPs) also localize to dynamic and stable**  
10 **microtubule structures.** The subcellular GFP localizations of the 87 DAPs identified by  
11 fractionation and mass spectrometry (Figure 2) were categorized as localizing exclusively to the  
12 disc (N=42) (disc only, B) or to both the disc and other cytoskeletal structures, including the  
13 flagella (N=31), the median body (N=12), and lateral crest (N=4). The Venn diagram indicates  
14 DAPs with overlapping localizations to the disc, flagella, median body, and lateral crest (A).  
15 Representative localizations are shown for the 12 DAPs localizing to the disc and median body  
16 (mb, C); the 11 localizing to the disc, median body and flagella (mb and fl, D); and the 18  
17 localizing to the disc and flagella only (N=18, E). Two DAPs localized to the lateral crest and disc  
18 (F) and two DAPs localized to the lateral crest and flagella (2). The flagella category includes  
19 localizations to either the basal bodies and /or to the cytoplasmic or membrane bound regions  
20 of the flagella. Scale bars = 5  $\mu\text{m}$ .

21

1 **Figure 4. Disc-associated proteins localize to structurally distinct regions of the ventral disc. A**

2 Venn Diagram (A) shows categorization of the 54 new DAPs by their localization to distinct  
3 regions of the disc, including the MT spiral array (body), disc margin (DM), ventral groove (VG),  
4 dense bands (DB), and overlap zone (OZ). In B, representative DAPs defining each localization  
5 category are shown with their functional annotations. Scale bars = 5  $\mu$ m.

6

7 **Figure 5. The majority of disc associated proteins (DAPs) lack known microtubule binding**

8 **domains**

9 PFAM domains are summarized and ranked by abundance for the 87 confirmed *Giardia* DAPs.  
10 CAP\_GLY and kinesin motor domains are the only known MT-binding motifs. The five DAPs with  
11 Nek kinase domains that also possess ankyrin repeat domains are not included in the final  
12 summary.

13

14 **Figure 6. The overall composition and structural integrity of the ventral disc is insensitive to**  
15 **microtubule drugs and extraction with high salt and detergent.** The area and overall structure  
16 of the disc body, overlap zone (oz) and central bare area (ba) are not affected by treatment  
17 with either MT stabilizing or depolymerizing drugs such as Taxol or nocodazole (A). In contrast,  
18 other cytoskeletal elements, including the flagella, are dynamic and sensitive to MT drugs (B).  
19 SDS-PAGE of fractions (pellet, P, and supernatant S) from 0 to 2M KCl extractions shows that  
20 salt also has little effect on extracted proteins (C). Furthermore, the GFP-tagged disc protein

- 1 MBP remains associated with the disc even after extraction with 1M KCl (images in D, green), as
- 2 do  $\alpha$ -tubulin and the microribbon protein  $\delta$ -giardin as seen via Western blot (D). Scale bars = 5
- 3  $\mu\text{m}$ .

1 **Bibliography**

2

3 **Akhmanova, A. and Hoogenraad, C. C.** (2005). Microtubule plus-end-tracking proteins:  
4 mechanisms and functions. *Curr Opin Cell Biol* **17**, 47-54.

5 **Akhmanova, A. and Steinmetz, M. O.** (2015). Control of microtubule organization and  
6 dynamics: two ends in the limelight. *Nat Rev Mol Cell Biol* **16**, 711-26.

7 **Amos, L. A.** (2004). Microtubule structure and its stabilisation. *Org Biomol Chem* **2**,  
8 2153-60.

9 **Amos, L. A.** (2008). The tektin family of microtubule-stabilizing proteins. *Genome Biol* **9**,  
10 229.

11 **Andersson, J. O., Sjogren, A. M., Horner, D. S., Murphy, C. A., Dyal, P. L., Svard, S. G.,**  
12 **Logsdon, J. M., Jr., Ragan, M. A., Hirt, R. P. and Roger, A. J.** (2007). A genomic survey of the fish  
13 parasite *Spironucleus salmonicida* indicates genomic plasticity among diplomonads and  
14 significant lateral gene transfer in eukaryote genome evolution. *BMC Genomics* **8**, 51.

15 **Baker, D. A., Holberton, D. V. and Marshall, J.** (1988). Sequence of a giardin subunit  
16 cDNA from *Giardia lamblia*. *Nucleic Acids Res* **16**, 7177.

17 **Basnet, N., Nedožralova, H., Crevenna, A. H., Bodakuntla, S., Schlichthaerle, T.,**  
18 **Taschner, M., Cardone, G., Janke, C., Jungmann, R., Magiera, M. M. et al.** (2018). Direct  
19 induction of microtubule branching by microtubule nucleation factor SSNA1. *Nat Cell Biol* **20**,  
20 1172-1180.

- 1           **Bauer, B., Engelbrecht, S., Bakker-Grunwald, T. and Scholze, H.** (1999). Functional  
2 identification of alpha 1-giardin as an annexin of *Giardia lamblia*. *FEMS Microbiol Lett* **173**, 147-  
3 53.
- 4           **Bennett, V. and Davis, J.** (1981). Erythrocyte ankyrin: immunoreactive analogues are  
5 associated with mitotic structures in cultured cells and with microtubules in brain. *Proc Natl*  
6 *Acad Sci U S A* **78**, 7550-4.
- 7           **Bowne-Anderson, H., Hibbel, A. and Howard, J.** (2015). Regulation of Microtubule  
8 Growth and Catastrophe: Unifying Theory and Experiment. *Trends Cell Biol* **25**, 769-779.
- 9           **Brown, J. R., Schwartz, C. L., Heumann, J. M., Dawson, S. C. and Hoenger, A.** (2016). A  
10 detailed look at the cytoskeletal architecture of the *Giardia lamblia* ventral disc. *J Struct Biol*  
11 **194**, 38-48.
- 12           **Campanati, L., Bre, M. H., Levilliers, N. and de Souza, W.** (1999). Expression of tubulin  
13 polyglycylation in *Giardia lamblia*. *Biol Cell* **91**, 499-506.
- 14           **Chaaban, S. and Brouhard, G. J.** (2017). A microtubule bestiary: structural diversity in  
15 tubulin polymers. *Mol Biol Cell* **28**, 2924-2931.
- 16           **Cheissin, E. M.** (1964). Ultrastructure of *Lamblia Duodenalis*. I. Body Surface, Sucking  
17 Disc and Median Bodies. *J Protozool* **11**, 91-8.
- 18           **Crossley, R. and Holberton, D. V.** (1983a). Characterization of proteins from the  
19 cytoskeleton of *Giardia lamblia*. *J Cell Sci* **59**, 81-103.
- 20           **Crossley, R. and Holberton, D. V.** (1983b). Selective extraction with Sarkosyl and  
21 repolymerization in vitro of cytoskeleton proteins from *Giardia*. *J Cell Sci* **62**, 419-38.



1           **Crossley, R. and Holberton, D. V.** (1985). Assembly of 2.5 nm filaments from giardin, a  
2 protein associated with cytoskeletal microtubules in *Giardia*. *J Cell Sci* **78**, 205-31.

3           **Cyrklaff, M., Kudryashev, M., Leis, A., Leonard, K., Baumeister, W., Menard, R.,**  
4 **Meissner, M. and Frischknecht, F.** (2007). Cryoelectron tomography reveals periodic material  
5 at the inner side of subpellicular microtubules in apicomplexan parasites. *J Exp Med* **204**, 1281-  
6 7.

7           **Dauids, B. J., Gilbert, M. A., Liu, Q., Reiner, D. S., Smith, A. J., Lauwaet, T., Lee, C.,**  
8 **McArthur, A. G. and Gillin, F. D.** (2011). An atypical proprotein convertase in *Giardia lamblia*  
9 differentiation. *Mol Biochem Parasitol* **175**, 169-80.

10          **Dauids, B. J., Williams, S., Lauwaet, T., Palanca, T. and Gillin, F. D.** (2008). *Giardia*  
11 *lamblia* aurora kinase: a regulator of mitosis in a binucleate parasite. *Int J Parasitol* **38**, 353-69.

12          **Davis, J. Q. and Bennett, V.** (1984). Brain ankyrin. A membrane-associated protein with  
13 binding sites for spectrin, tubulin, and the cytoplasmic domain of the erythrocyte anion  
14 channel. *J Biol Chem* **259**, 13550-9.

15          **Dawson, S. C.** (2010). An insider's guide to the microtubule cytoskeleton of *Giardia*. *Cell*  
16 *Microbiol* **12**, 588-98.

17          **Dawson, S. C. and House, S. A.** (2010). Imaging and analysis of the microtubule  
18 cytoskeleton in *Giardia*. *Methods Cell Biol* **97**, 307-39.

19          **Dawson, S. C. and Paredez, A. R.** (2013). Alternative cytoskeletal landscapes:  
20 cytoskeletal novelty and evolution in basal excavate protists. *Curr Opin Cell Biol* **25**, 134-41.

- 1           **Dawson, S. C., Sagolla, M. S., Mancuso, J. J., Woessner, D. J., House, S. A., Fritz-Laylin,**  
2 **L. and Cande, W. Z.** (2007). Kinesin-13 regulates flagellar, interphase, and mitotic microtubule  
3 dynamics in *Giardia intestinalis*. *Eukaryot Cell* **6**, 2354-64.
- 4           **Ebneter, J. A. and Hehl, A. B.** (2014). The single epsin homolog in *Giardia lamblia*  
5 localizes to the ventral disk of trophozoites and is not associated with clathrin membrane coats.  
6 *Mol Biochem Parasitol* **197**, 24-7.
- 7           **Egydio de Carvalho, C., Tanaka, H., Iguchi, N., Ventela, S., Nojima, H. and Nishimune, Y.**  
8 (2002). Molecular cloning and characterization of a complementary DNA encoding sperm tail  
9 protein SHIPPO 1. *Biol Reprod* **66**, 785-95.
- 10           **Einarsson, E., Ma'ayeh, S. and Svard, S. G.** (2016). An up-date on *Giardia* and giardiasis.  
11 *Curr Opin Microbiol* **34**, 47-52.
- 12           **Ellis, J. G., Davila, M. and Chakrabarti, R.** (2003). Potential involvement of extracellular  
13 signal-regulated kinase 1 and 2 in encystation of a primitive eukaryote, *Giardia lamblia*. Stage-  
14 specific activation and intracellular localization. *J Biol Chem* **278**, 1936-45.
- 15           **Elmendorf, H. G., Dawson, S. C. and McCaffery, J. M.** (2003). The cytoskeleton of  
16 *Giardia lamblia*. *Int J Parasitol* **33**, 3-28.
- 17           **Feely, D. E., Hoberton, D.V., Erlandsen, S.L.** (1990). The Biology of *Giardia*. In *Giardiasis*,  
18 vol. 3 (ed. E. A. Meyer), pp. 11-50. Amsterdam: Elsevier.
- 19           **Feely, D. E., Schollmeyer, J. V. and Erlandsen, S. L.** (1982). *Giardia* spp.: distribution of  
20 contractile proteins in the attachment organelle. *Exp Parasitol* **53**, 145-54.
- 21           **Francia, M. E., Jordan, C. N., Patel, J. D., Sheiner, L., Demerly, J. L., Fellows, J. D., de**  
22 **Leon, J. C., Morrissette, N. S., Dubremetz, J. F. and Striepen, B.** (2012). Cell division in

- 1 Apicomplexan parasites is organized by a homolog of the striated rootlet fiber of algal flagella.  
2 *PLoS Biol* **10**, e1001444.
- 3 **Friend, D. S.** (1966). The fine structure of *Giardia muris*. *J Cell Biol* **29**, 317-32.
- 4 **Fry, A. M., Bayliss, R. and Roig, J.** (2017). Mitotic Regulation by NEK Kinase Networks.  
5 *Front Cell Dev Biol* **5**, 102.
- 6 **Garnham, C. P. and Roll-Mecak, A.** (2012). The chemical complexity of cellular  
7 microtubules: tubulin post-translational modification enzymes and their roles in tuning  
8 microtubule functions. *Cytoskeleton (Hoboken)* **69**, 442-63.
- 9 **Hagen, K. D., Hirakawa, M. P., House, S. A., Schwartz, C. L., Pham, J. K., Cipriano, M. J.,  
10 De La Torre, M. J., Sek, A. C., Du, G., Forsythe, B. M. et al.** (2011). Novel structural components  
11 of the ventral disc and lateral crest in *Giardia intestinalis*. *PLoS Negl Trop Dis* **5**, e1442.
- 12 **Hansen, W. R., Tulyathan, O., Dawson, S. C., Cande, W. Z. and Fletcher, D. A.** (2006).  
13 *Giardia lamblia* attachment force is insensitive to surface treatments. *Eukaryot Cell* **5**, 781-3.
- 14 **Harb, O. S. and Roos, D. S.** (2015). The Eukaryotic Pathogen Databases: a functional  
15 genomic resource integrating data from human and veterinary parasites. *Methods Mol Biol*  
16 **1201**, 1-18.
- 17 **Hardin, W. R., Li, R., Xu, J., Shelton, A. M., Alas, G. C. M., Minin, V. N. and Paredes, A.  
18 R.** (2017). Myosin-independent cytokinesis in *Giardia* utilizes flagella to coordinate force  
19 generation and direct membrane trafficking. *Proc Natl Acad Sci U S A* **114**, E5854-E5863.
- 20 **Holberton, D. V.** (1973). Fine structure of the ventral disk apparatus and the mechanism  
21 of attachment in the flagellate *Giardia muris*. *J Cell Sci* **13**, 11-41.

1           **Holberton, D. V.** (1974). Attachment of *Giardia*-a hydrodynamic model based on  
2 flagellar activity. *J Exp Biol* **60**, 207-21.

3           **Holberton, D. V.** (1981). Arrangement of subunits in microribbons from *Giardia*. *J Cell Sci*  
4 **47**, 167-85.

5           **Holberton, D. V. and Ward, A. P.** (1981). Isolation of the cytoskeleton from *Giardia*.  
6 Tubulin and a low-molecular-weight protein associated with microribbon structures. *J Cell Sci*  
7 **47**, 139-66.

8           **House, S. A., Richter, D. J., Pham, J. K. and Dawson, S. C.** (2011). *Giardia* flagellar  
9 motility is not directly required to maintain attachment to surfaces. *PLoS Pathog* **7**, e1002167.

10           **Hu, K., Johnson, J., Florens, L., Fraunholz, M., Suravajjala, S., DiLullo, C., Yates, J., Roos,**  
11 **D. S. and Murray, J. M.** (2006). Cytoskeletal components of an invasion machine--the apical  
12 complex of *Toxoplasma gondii*. *PLoS Pathog* **2**, e13.

13           **Ichikawa, M. and Bui, K. H.** (2018). Microtubule Inner Proteins: A Meshwork of Luminal  
14 Proteins Stabilizing the Doublet Microtubule. *Bioessays* **40**.

15           **Jenkins, M. C., O'Brien, C. N., Murphy, C., Schwarz, R., Miska, K., Rosenthal, B. and**  
16 **Trout, J. M.** (2009). Antibodies to the ventral disc protein delta-giardin prevent in vitro binding  
17 of *Giardia lamblia* trophozoites. *J Parasitol* **95**, 895-9.

18           **Lauwaet, T., Davids, B. J., Torres-Escobar, A., Birkeland, S. R., Cipriano, M. J., Preheim,**  
19 **S. P., Palm, D., Svard, S. G., McArthur, A. G. and Gillin, F. D.** (2007). Protein phosphatase 2A  
20 plays a crucial role in *Giardia lamblia* differentiation. *Mol Biochem Parasitol* **152**, 80-9.

1           **Lauwaet, T., Smith, A. J., Reiner, D. S., Romijn, E. P., Wong, C. C., Davids, B. J., Shah, S.**  
2 **A., Yates, J. R., 3rd and Gillin, F. D.** (2011). Mining the *Giardia* genome and proteome for  
3 conserved and unique basal body proteins. *Int J Parasitol* **41**, 1079-92.

4           **Li, J., Mahajan, A. and Tsai, M. D.** (2006). Ankyrin repeat: a unique motif mediating  
5 protein-protein interactions. *Biochemistry* **45**, 15168-78.

6           **Linck, R., Fu, X., Lin, J., Ouch, C., Schefter, A., Steffen, W., Warren, P. and Nicastro, D.**  
7 (2014). Insights into the structure and function of ciliary and flagellar doublet microtubules:  
8 tektins, Ca<sup>2+</sup>-binding proteins, and stable protofilaments. *J Biol Chem* **289**, 17427-44.

9           **Long, S., Anthony, B., Drewry, L. L. and Sibley, L. D.** (2017). A conserved ankyrin repeat-  
10 containing protein regulates conoid stability, motility and cell invasion in *Toxoplasma gondii*.  
11 *Nat Commun* **8**, 2236.

12           **Manning, G., Reiner, D. S., Lauwaet, T., Dacre, M., Smith, A., Zhai, Y., Svard, S. and**  
13 **Gillin, F. D.** (2011). The minimal kinome of *Giardia lamblia* illuminates early kinase evolution  
14 and unique parasite biology. *Genome Biol* **12**, R66.

15           **McInally SG, Hagen KD, Nosala C, Williams J, Nguyen K, Booker J, Jones K and Dawson,**  
16 **S.** (2018). Robust and stable transcriptional repression in *Giardia* using CRISPRi. *Molecular*  
17 *Biology of the Cell* in press.

18           **Morrison, H. G., McArthur, A. G., Gillin, F. D., Aley, S. B., Adam, R. D., Olsen, G. J., Best,**  
19 **A. A., Cande, W. Z., Chen, F., Cipriano, M. J. et al.** (2007). Genomic minimalism in the early  
20 diverging intestinal parasite *Giardia lamblia*. *Science* **317**, 1921-6.

21           **Nogales, E., Whittaker, M., Milligan, R. A. and Downing, K. H.** (1999). High-resolution  
22 model of the microtubule. *Cell* **96**, 79-88.

1           **Nosala, C. and Dawson, S. C.** (2015). The Critical Role of the Cytoskeleton in the  
2 Pathogenesis of Giardia. *Curr Clin Microbiol Rep* **2**, 155-162.

3           **Nosala, C. and Dawson, S. C.** (2017). The ventral disc is a flexible microtubule structure  
4 that depends on a domed conformation for functional attachment of *Giardia lamblia*. *BioRxiv*  
5 **213421**.

6           **Nosala, C., Hagen, K. D. and Dawson, S. C.** (2018). 'Disc-o-Fever': Getting Down with  
7 Giardia's Groovy Microtubule Organelle. *Trends Cell Biol* **28**, 99-112.

8           **Owa, M., Uchihashi, T., Haruaki, H., Yamano, T., Iguchi, H., Fukuzawa, H.,**  
9 **Wakabayashi, K., Ando, T., M. Kikkawa.** (2018). Inner lumen proteins stabilize doublet  
10 microtubules in cilia/flagella.

11           **Palm, D., Weiland, M., McArthur, A. G., Winiacka-Krusnell, J., Cipriano, M. J.,**  
12 **Birkeland, S. R., Pacocha, S. E., Davids, B., Gillin, F., Linder, E. et al.** (2005). Developmental  
13 changes in the adhesive disk during *Giardia* differentiation. *Mol Biochem Parasitol* **141**, 199-  
14 207.

15           **Palm, J. E., Weiland, M. E., Griffiths, W. J., Ljungstrom, I. and Svard, S. G.** (2003).  
16 Identification of immunoreactive proteins during acute human giardiasis. *J Infect Dis* **187**, 1849-  
17 59.

18           **Peattie, D. A.** (1990). The giardins of *Giardia lamblia*: genes and proteins with promise.  
19 *Parasitol Today* **6**, 52-56.

20           **Pfannenschmid, F., Wimmer, V. C., Rios, R. M., Geimer, S., Krockel, U., Leiherer, A.,**  
21 **Haller, K., Nemcova, Y. and Mages, W.** (2003). *Chlamydomonas* DIP13 and human NA14: a new

1 class of proteins associated with microtubule structures is involved in cell division. *J Cell Sci* **116**,  
2 1449-62.

3 **Preisner, H., Karin, E. L., Poschmann, G., Stuhler, K., Pupko, T. and Gould, S. B.** (2016).  
4 The Cytoskeleton of Parabasalian Parasites Comprises Proteins that Share Properties Common  
5 to Intermediate Filament Proteins. *Protist* **167**, 526-543.

6 **Reiterer, V., Eysers, P. A. and Farhan, H.** (2014). Day of the dead: pseudokinases and  
7 pseudophosphatases in physiology and disease. *Trends Cell Biol* **24**, 489-505.

8 **Russell, J. J., Theriot, J. A., Sood, P., Marshall, W. F., Landweber, L. F., Fritz-Laylin, L.,  
9 Polka, J. K., Oliferenko, S., Gerbich, T., Gladfelter, A. et al.** (2017). Non-model model  
10 organisms. *BMC Biol* **15**, 55.

11 **Schwartz, C. L., Heumann, J. M., Dawson, S. C. and Hoenger, A.** (2012). A detailed,  
12 hierarchical study of *Giardia lamblia*'s ventral disc reveals novel microtubule-associated protein  
13 complexes. *PLoS One* **7**, e43783.

14 **Soltys, B. J. and Gupta, R. S.** (1994). Immunoelectron microscopy of *Giardia lamblia*  
15 cytoskeleton using antibody to acetylated alpha-tubulin. *Journal of Eukaryotic Microbiology* **41**,  
16 625-632.

17 **Stoddard, D., Zhao, Y., Bayless, B. A., Gui, L., Louka, P., Dave, D., Suryawanshi, S.,  
18 Tomasi, R. F., Dupuis-Williams, P., Baroud, C. N. et al.** (2018). *Tetrahymena* RIB72A and RIB72B  
19 are microtubule inner proteins in the ciliary doublet microtubules. *Mol Biol Cell* **29**, 2566-2577.

20 **Tumova, P., Kulda, J. and Nohynkova, E.** (2007). Cell division of *Giardia intestinalis*:  
21 assembly and disassembly of the adhesive disc, and the cytokinesis. *Cell Motil Cytoskeleton* **64**,  
22 288-98.

1           **Weber, K., Geisler, N., Plessmann, U., Bremerich, A., Lehtreck, K. F. and Melkonian,**  
2 **M.** (1993). SF-assemblin, the structural protein of the 2-nm filaments from striated microtubule  
3 associated fibers of algal flagellar roots, forms a segmented coiled coil. *J Cell Biol* **121**, 837-45.

4           **Weber, K., Schneider, A., Westermann, S., Muller, N. and Plessmann, U.** (1997).  
5 Posttranslational modifications of alpha- and beta-tubulin in *Giardia lamblia*, an ancient  
6 eukaryote. *FEBS Lett* **419**, 87-91.

7           **Weiland, M. E., McArthur, A. G., Morrison, H. G., Sogin, M. L. and Svard, S. G.** (2005).  
8 Annexin-like alpha giardins: a new cytoskeletal gene family in *Giardia lamblia*. *Int J Parasitol* **35**,  
9 617-26.

10           **Weiland, M. E., Palm, J. E., Griffiths, W. J., McCaffery, J. M. and Svard, S. G.** (2003).  
11 Characterisation of alpha-1 giardin: an immunodominant *Giardia lamblia* annexin with  
12 glycosaminoglycan-binding activity. *Int J Parasitol* **33**, 1341-51.

13           **Weisbrich, A., Honnappa, S., Jaussi, R., Okhrimenko, O., Frey, D., Jelesarov, I.,**  
14 **Akhmanova, A. and Steinmetz, M. O.** (2007). Structure-function relationship of CAP-Gly  
15 domains. *Nat Struct Mol Biol* **14**, 959-67.

16           **Woessner, D. J. and Dawson, S. C.** (2012). The *Giardia* median body protein is a ventral  
17 disc protein that is critical for maintaining a domed disc conformation during attachment.  
18 *Eukaryot Cell* **11**, 292-301.

19



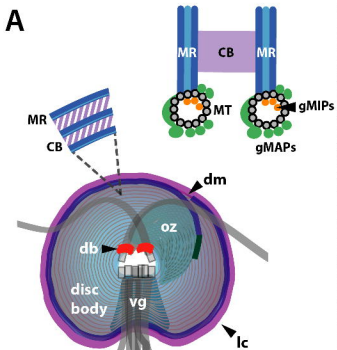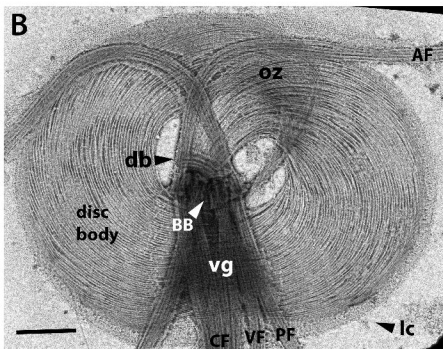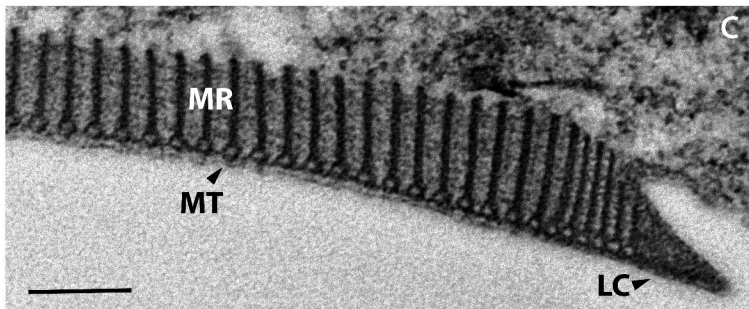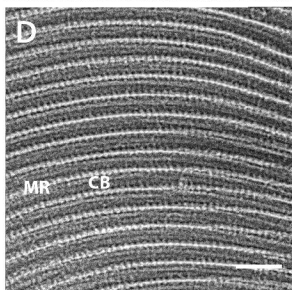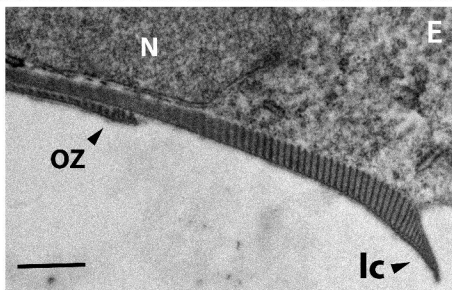

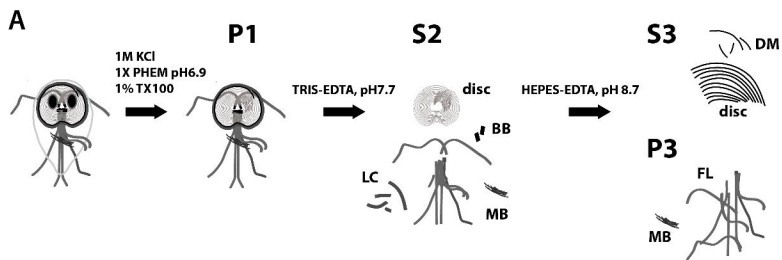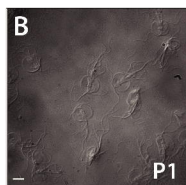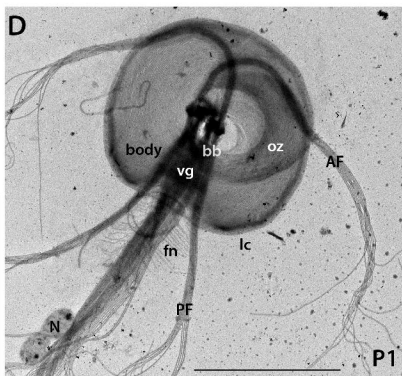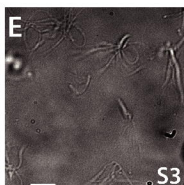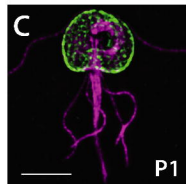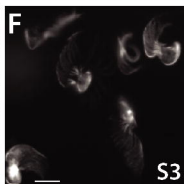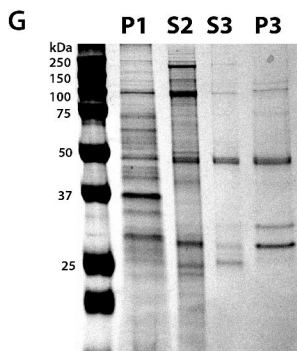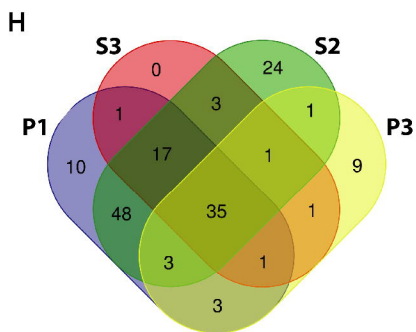

**A**

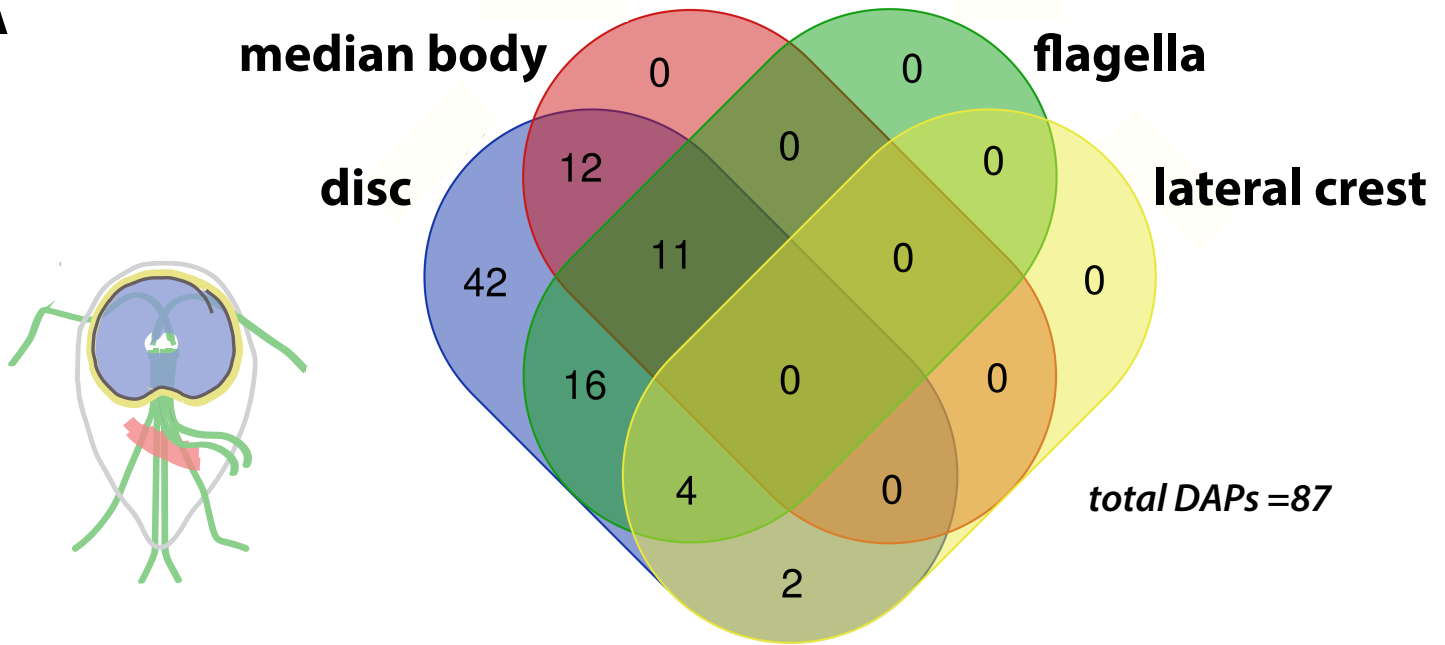

**B**

**disc only (42)**

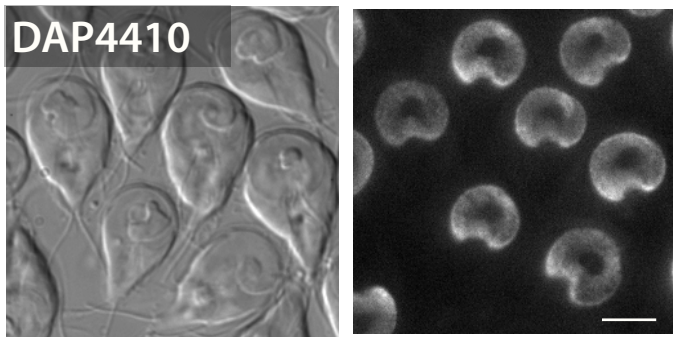

**C**

**disc/median body (12)**

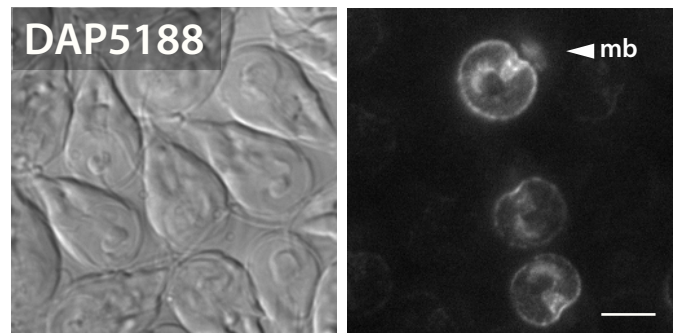

**D**

**disc/mb/flagella (11)**

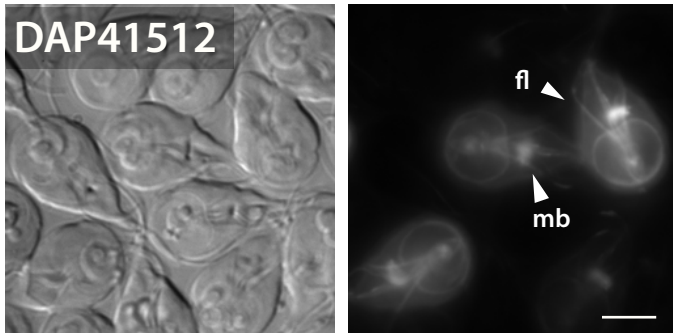

**E**

**disc/flagella (27)**

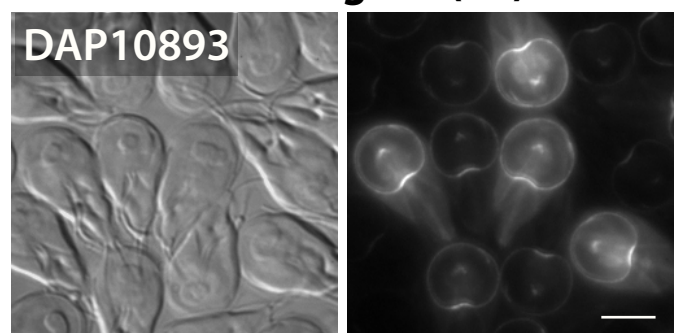

**F**

**disc/lateral crest (2)**

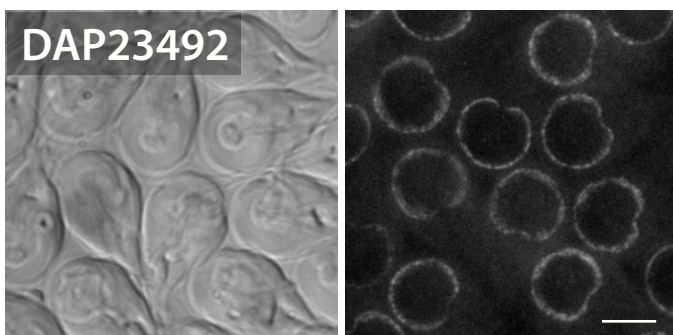

**G**

**disc/lateral crest/flagella (4)**

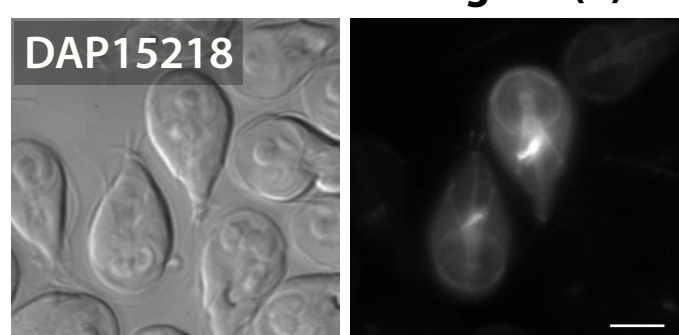

**A**

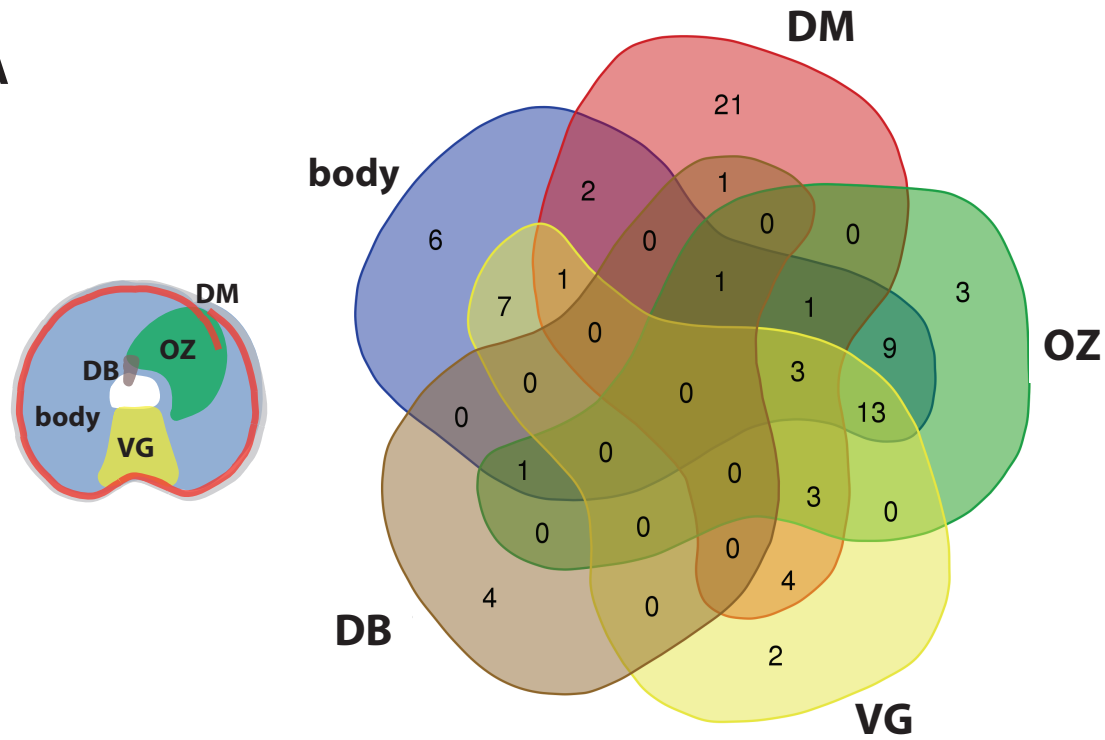

**B**

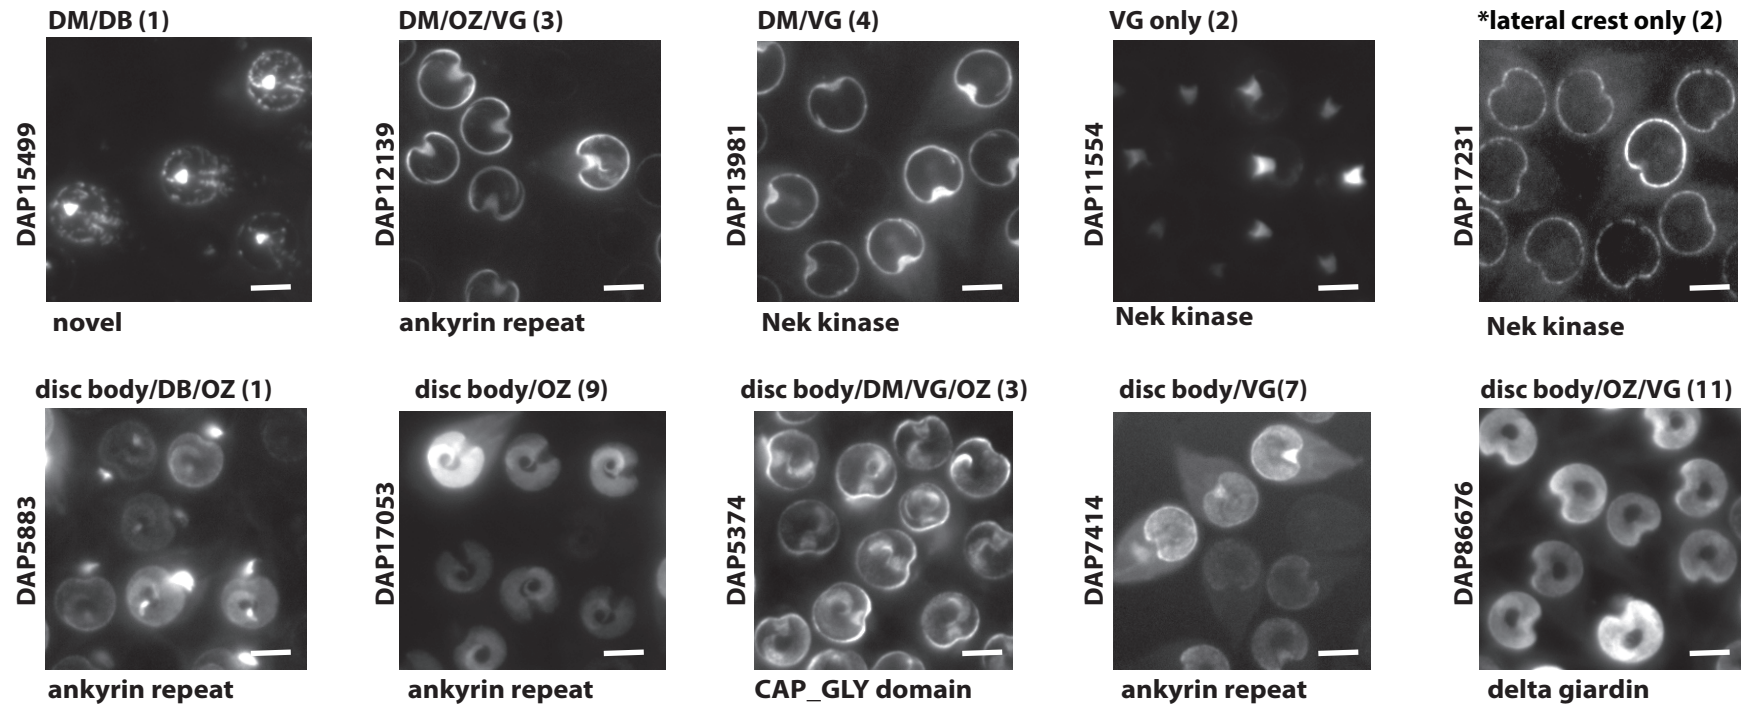

**\*\*no image disc body/DM (2)**

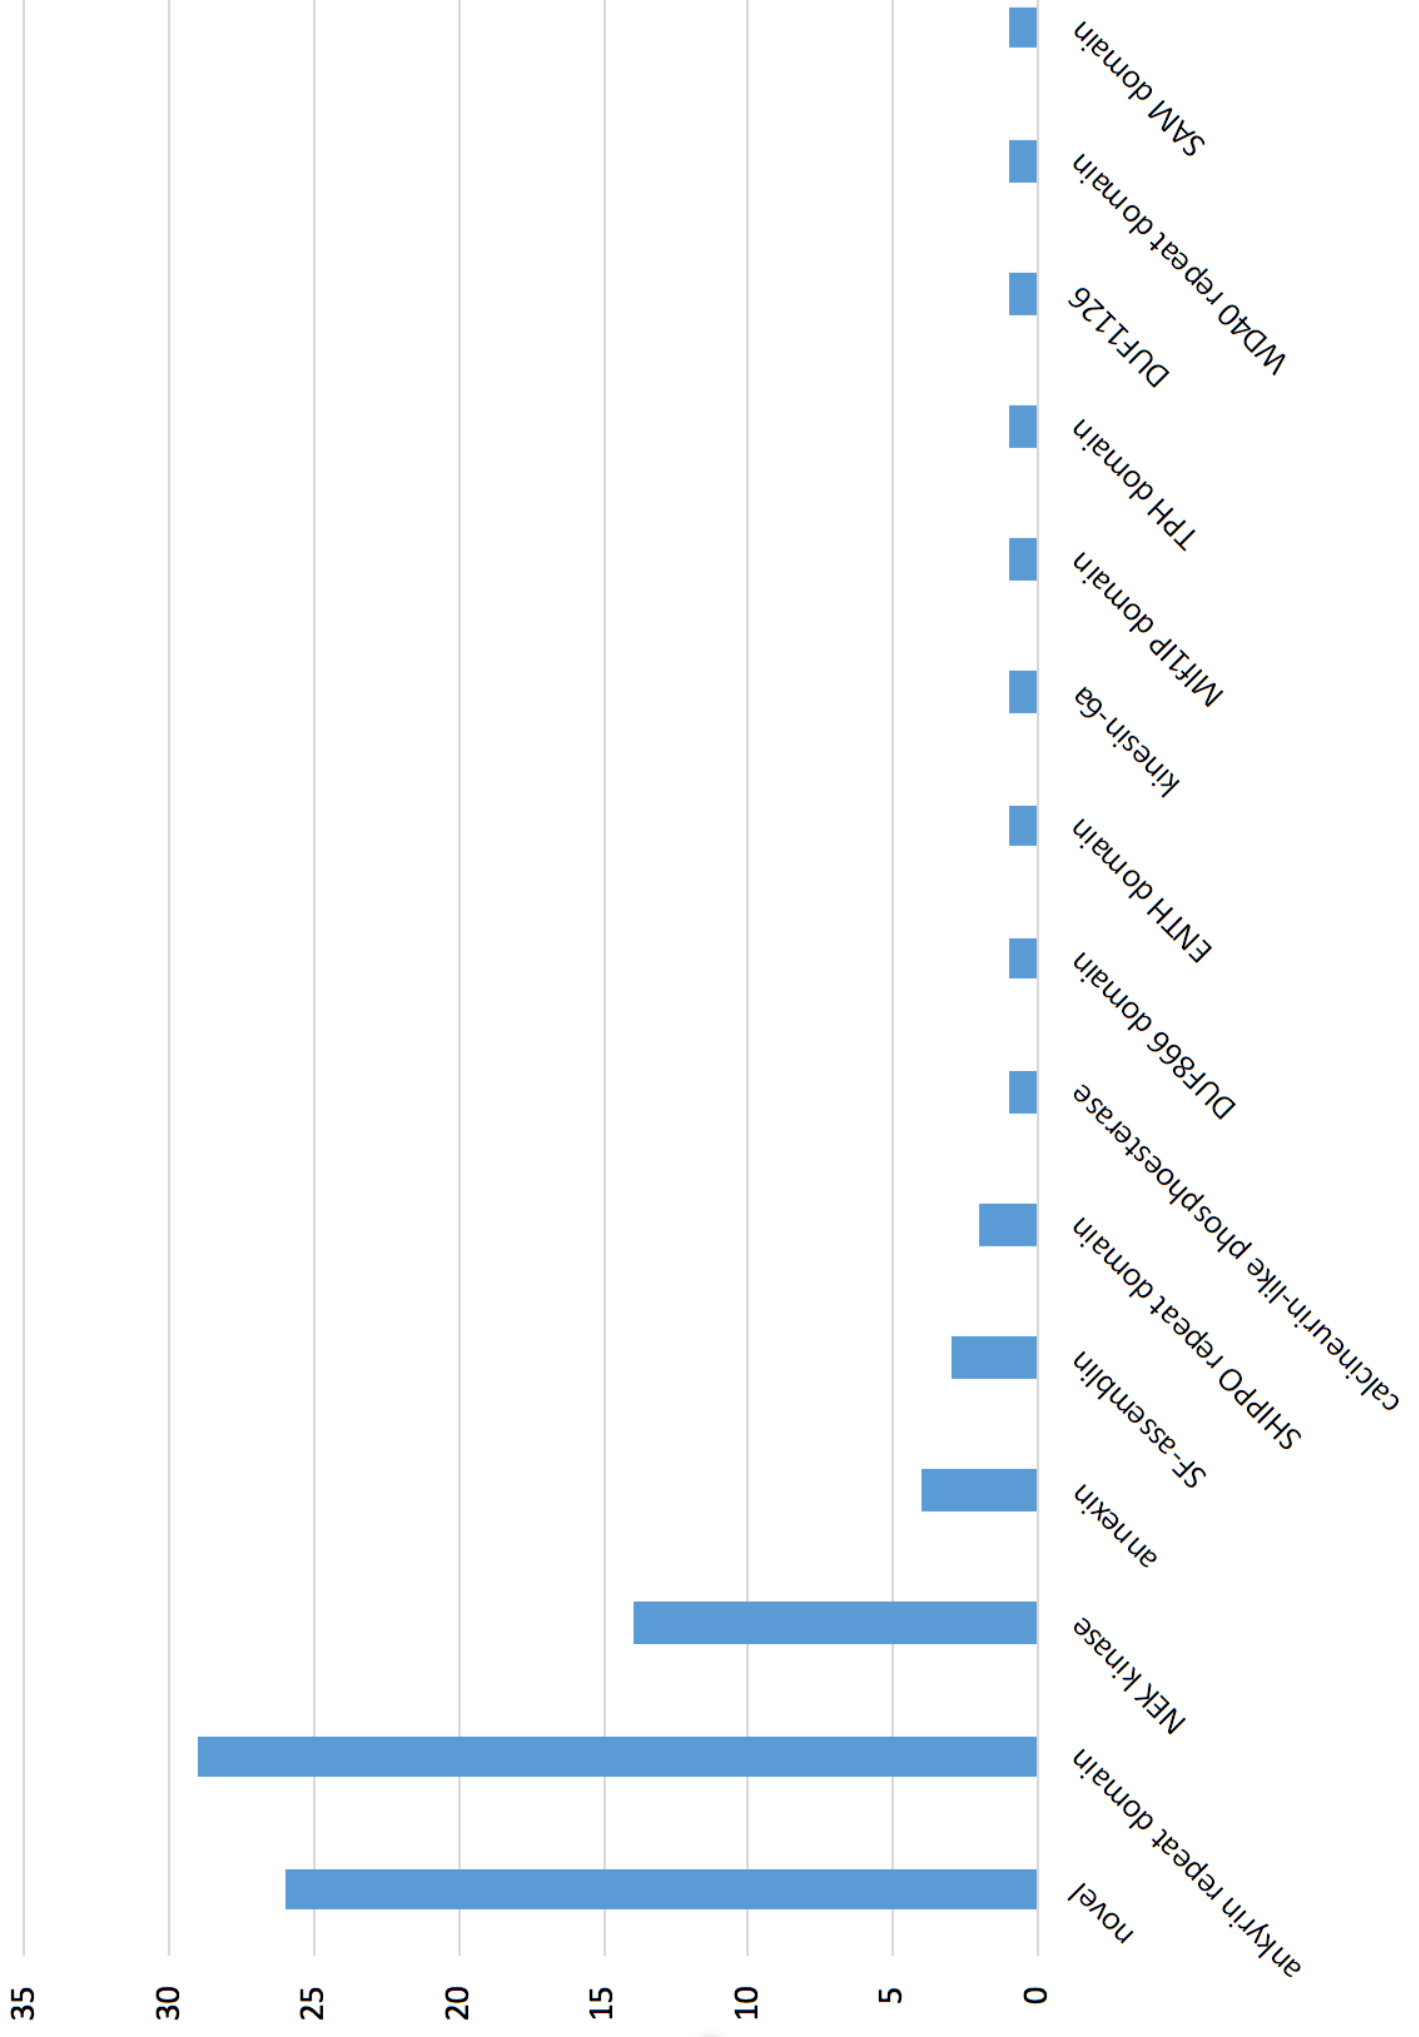

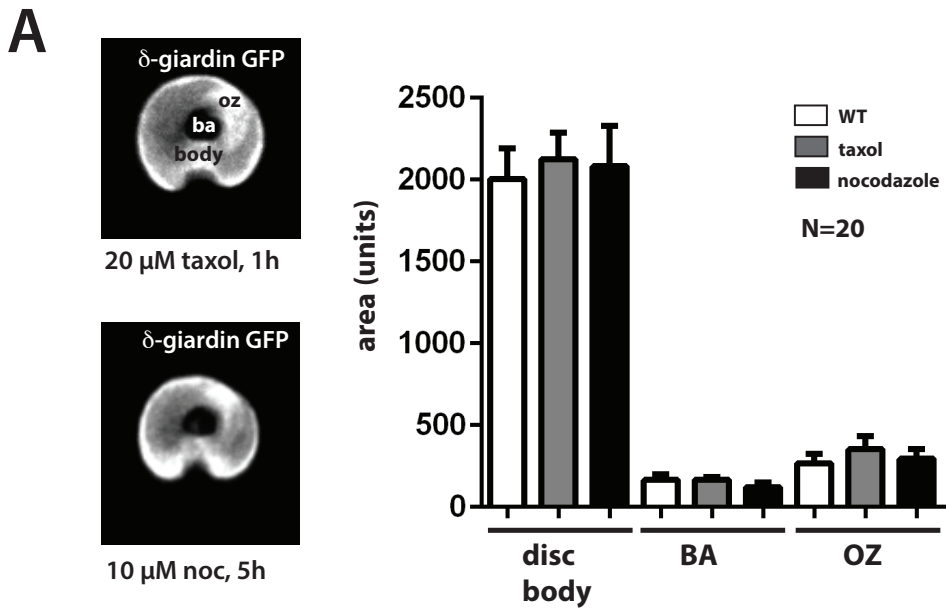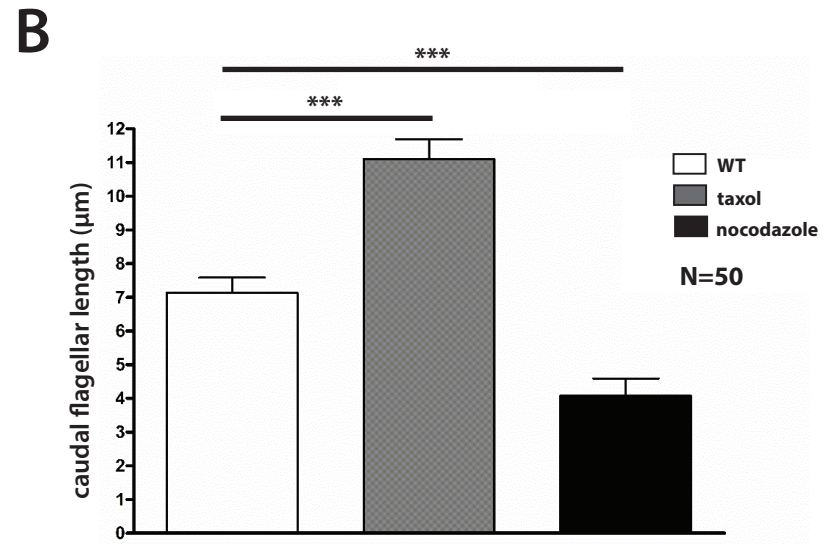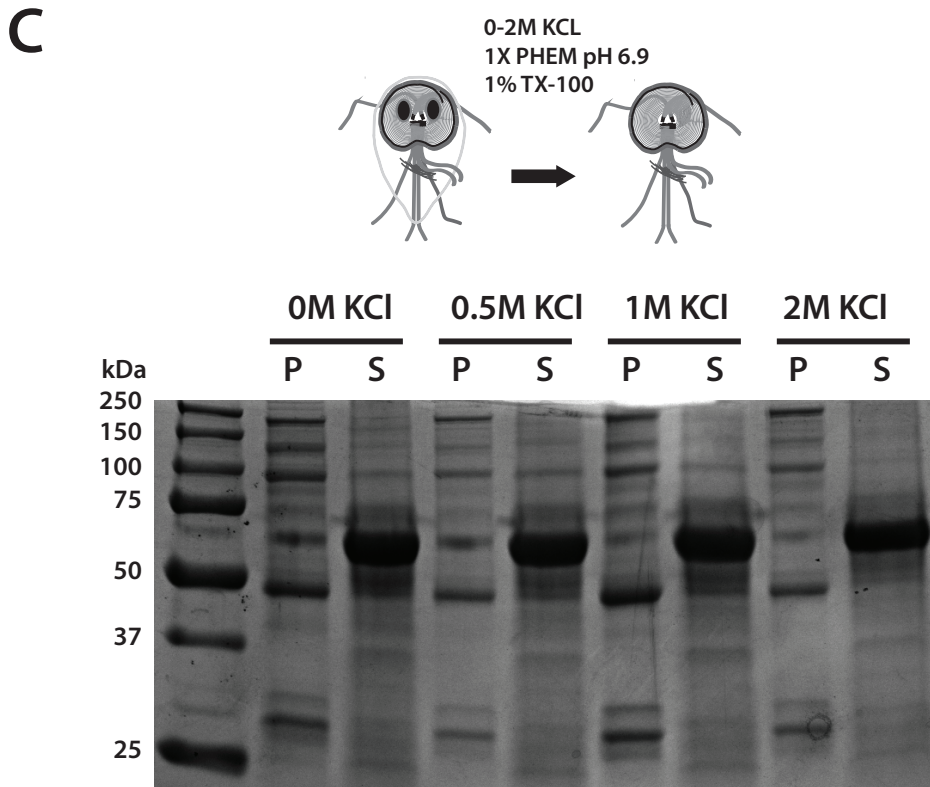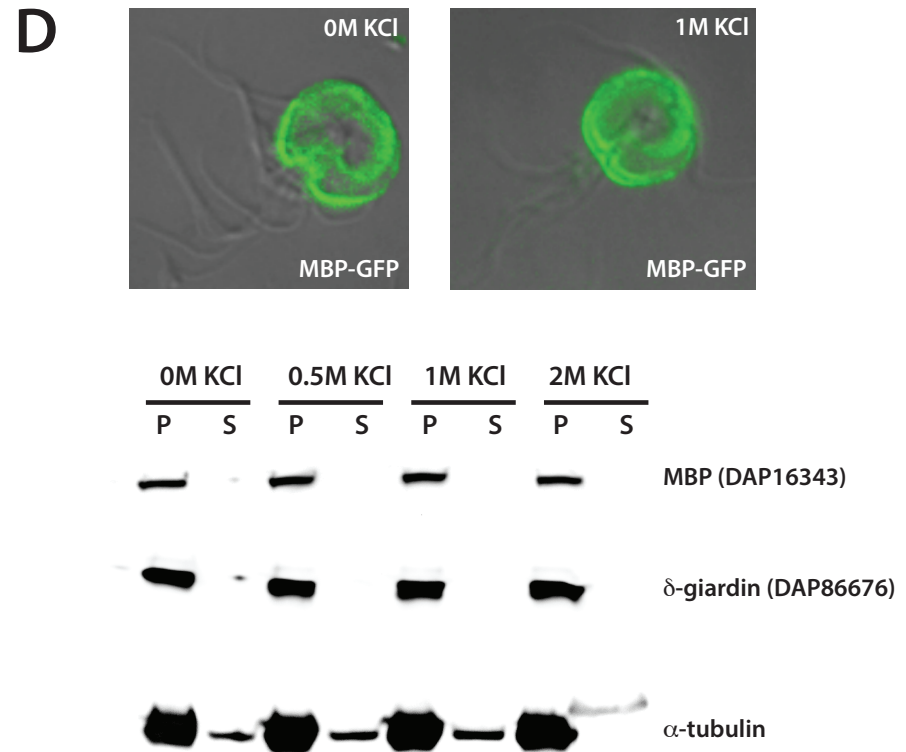

Source: https://www.biorxiv.org/content/10.1101/361105v3.full.pdf
